# Supplementary material for: Interventions with dual benefits for climate change and nutrition: a systematic scoping review, mapping and synthesis
Source: Research Square preprint supplement (doi:10.21203/rs.3.rs-8534390/v1), 2026-01-09
Supplement: Supplementary file 2 [file 40dbecfac455a0097350f7db.docx]

Interventions with dual benefits for climate change and nutrition: a systematic scoping review, mapping and synthesis

Supplementary Methods

Table of Contents

[Supplementary Methods 1: Preferred Reporting Items for Systematic reviews and Meta-Analyses extension for Scoping Reviews (PRISMA-ScR) Checklist 2](#_Toc217396009)

[Supplementary Methods 2: Literature Search Strategy 4](#_Toc217396010)

[2.1: Peer-reviewed literature: search summary 4](#_Toc217396011)

[2.2: Peer-reviewed literature - detailed search strategy by database 4](#_Toc217396012)

[2.3: Grey literature - detailed search strategy 8](#_Toc217396013)

[Supplementary Methods 3: Screening codes and guides 16](#_Toc217396014)

[3.1: Title and abstract screening codes 16](#_Toc217396015)

[3.2: Title and abstract screening guide 16](#_Toc217396016)

[3.3: Full text screening codes 16](#_Toc217396017)

[3.4: Full text screening guide 17](#_Toc217396018)

[Supplementary Methods 4: Conceptualization of climate-nutrition interventions through three possible scenarios 28](#_Toc217396019)

[Supplementary Methods 5: Elicit Prompts and Coding Categories 31](#_Toc217396020)

[5.1: Elicit Prompts 31](#_Toc217396021)

[5.2: Coding categories 39](#_Toc217396022)

[Supplementary Methods 6: Data extraction form and guide 54](#_Toc217396023)

[Supplementary Methods 7: Critical appraisal 71](#_Toc217396024)

[7.1 Critical appraisal form and guide 71](#_Toc217396025)

[7.2 Critical appraisal scoring approach 81](#_Toc217396026)

[References for Supplementary Methods 83](#_Toc217396027)

# Supplementary Methods 1: Preferred Reporting Items for Systematic reviews and Meta-Analyses extension for Scoping Reviews (PRISMA-ScR) Checklist

| **SECTION** | **ITEM** | **PRISMA-ScR CHECKLIST ITEM** | **REPORTED ON PAGE #** |
| --- | --- | --- | --- |
| **TITLE** | | | |
| Title | 1 | Identify the report as a scoping review. | 1 |
| **ABSTRACT** | | | |
| Structured summary | 2 | Provide a structured summary that includes (as applicable): background, objectives, eligibility criteria, sources of evidence, charting methods, results, and conclusions that relate to the review questions and objectives. | 1 |
| **INTRODUCTION** | | | |
| Rationale | 3 | Describe the rationale for the review in the context of what is already known. Explain why the review questions/objectives lend themselves to a scoping review approach. | 2 |
| Objectives | 4 | Provide an explicit statement of the questions and objectives being addressed with reference to their key elements (e.g., population or participants, concepts, and context) or other relevant key elements used to conceptualize the review questions and/or objectives. | 2 |
| **METHODS** | | | |
| Protocol and registration | 5 | Indicate whether a review protocol exists; state if and where it can be accessed (e.g., a Web address); and if available, provide registration information, including the registration number. | 13 |
| Eligibility criteria | 6 | Specify characteristics of the sources of evidence used as eligibility criteria (e.g., years considered, language, and publication status), and provide a rationale. | 13-14 |
| Information sources* | 7 | Describe all information sources in the search (e.g., databases with dates of coverage and contact with authors to identify additional sources), as well as the date the most recent search was executed. | 13 |
| Search | 8 | Present the full electronic search strategy for at least 1 database, including any limits used, such that it could be repeated. | Supplementary Methods 2 |
| Selection of sources of evidence† | 9 | State the process for selecting sources of evidence (i.e., screening and eligibility) included in the scoping review. | 13-15 |
| Data charting process‡ | 10 | Describe the methods of charting data from the included sources of evidence (e.g., calibrated forms or forms that have been tested by the team before their use, and whether data charting was done independently or in duplicate) and any processes for obtaining and confirming data from investigators. | 13-15 |
| Data items | 11 | List and define all variables for which data were sought and any assumptions and simplifications made. | 14 |
| Critical appraisal of individual sources of evidence§ | 12 | If done, provide a rationale for conducting a critical appraisal of included sources of evidence; describe the methods used and how this information was used in any data synthesis (if appropriate). | 15-16, Supplementary Methods 7 |
| Synthesis of results | 13 | Describe the methods of handling and summarizing the data that were charted. | 13-16 |
| **RESULTS** | | | |
| Selection of sources of evidence | 14 | Give numbers of sources of evidence screened, assessed for eligibility, and included in the review, with reasons for exclusions at each stage, ideally using a flow diagram. | 3, Supplementary Results 2 |
| Characteristics of sources of evidence | 15 | For each source of evidence, present characteristics for which data were charted and provide the citations. | 3-11 |
| Critical appraisal within sources of evidence | 16 | If done, present data on critical appraisal of included sources of evidence (see item 12). | 10 |
| Results of individual sources of evidence | 17 | For each included source of evidence, present the relevant data that were charted that relate to the review questions and objectives. | Online evidence and gap map (EGM) |
| Synthesis of results | 18 | Summarize and/or present the charting results as they relate to the review questions and objectives. | 3-10 |
| **DISCUSSION** | | | |
| Summary of evidence | 19 | Summarize the main results (including an overview of concepts, themes, and types of evidence available), link to the review questions and objectives, and consider the relevance to key groups. | 11-13 |
| Limitations | 20 | Discuss the limitations of the scoping review process. | 11 |
| Conclusions | 21 | Provide a general interpretation of the results with respect to the review questions and objectives, as well as potential implications and/or next steps. | 13 |
| **FUNDING** | | | |
| Funding | 22 | Describe sources of funding for the included sources of evidence, as well as sources of funding for the scoping review. Describe the role of the funders of the scoping review. | 18 |

JBI = Joanna Briggs Institute; PRISMA-ScR = Preferred Reporting Items for Systematic reviews and Meta-Analyses extension for Scoping Reviews.

* Where *sources of evidence* (see second footnote) are compiled from, such as bibliographic databases, social media platforms, and Web sites.

† A more inclusive/heterogeneous term used to account for the different types of evidence or data sources (e.g., quantitative and/or qualitative research, expert opinion, and policy documents) that may be eligible in a scoping review as opposed to only studies. This is not to be confused with *information sources* (see first footnote).

‡ The frameworks by Arksey and O’Malley (6) and Levac and colleagues (7) and the JBI guidance (4, 5) refer to the process of data extraction in a scoping review as data charting*.*

§The process of systematically examining research evidence to assess its validity, results, and relevance before using it to inform a decision. This term is used for items 12 and 19 instead of "risk of bias" (which is more applicable to systematic reviews of interventions) to include and acknowledge the various sources of evidence that may be used in a scoping review (e.g., quantitative and/or qualitative research, expert opinion, and policy document).

*From:* Tricco AC, Lillie E, Zarin W, O'Brien KK, Colquhoun H, Levac D, et al. PRISMA Extension for Scoping Reviews (PRISMAScR): Checklist and Explanation. Ann Intern Med. 2018;169:467–473. [doi: 10.7326/M18-0850](http://annals.org/aim/fullarticle/2700389/prisma-extension-scoping-reviews-prisma-scr-checklist-explanation).1

# Supplementary Methods 2: Literature Search Strategy

## 2.1: Peer-reviewed literature: search summary

We developed the strategy in collaboration with a professional medical librarian (JC) trained in knowledge synthesis. The search was executed in Ovid MEDLINE(R) and Epub Ahead of Print, In-Process, In-Data-Review & Other Non-Indexed Citations and Daily <1946 to September 9, 2024>; Clarivate Web of Science Core Collection All Databases (September 10, 2024); Elsevier SCOPUS (September 10, 2024); and WHO Global Index Medicus (September 11, 2024). We used both controlled vocabulary, such as the National Library of Medicine’s MeSH (Medical Subject Headings) and keywords. A total of 15,113 peer-reviewed literature records were identified, before deduplication.

| **Database [Platform]** *Revised search run September 10 and 11, 2024* | **Results** |
| --- | --- |
| Ovid MEDLINE(R) and Epub Ahead of Print, In-Process & Other Non-Indexed Citations and Daily 1946 to September 9, 2024 | 5048 |
| Clarivate Web of Science Core Collection (September 10, 2024) | 4322 |
| Elsevier- SCOPUS (September 10, 2024) | 5103 |
| WHO Global Index Medicus (September 11, 2024) | 640 |
| **TOTAL* (Duplicates not removed)** | **15113** |

## 2.2: Peer-reviewed literature - detailed search strategy by database

**Ovid MEDLINE(R) and Epub Ahead of Print, In-Process & Other Non-Indexed Citations and Daily 1946 to September 9, 2024**

| **#** | **Searches** | **Results** |
| --- | --- | --- |
| 1 | "Diet, Food, and Nutrition"/ or (Food adj2 (supply or supplies or stor* or security or quality or safety or safe or industr* or system? or insecur*)).tw,kf. | 90924 |
| 2 | Diet/ or ((diet* adj3 (optimi* or status or change* or divers* or quality)) or "diet-related*").tw,kf. | 224234 |
| 3 | Energy Intake/ or ((energy or calor*) adj2 intake*).tw,kf. | 71644 |
| 4 | Food, Fortified/ or exp Vitamins/ or exp "Trace Elements"/ or *Micronutrients/ or nutrients/ or *Dietary Carbohydrates/ or (food* adj3 (fortif* or enrich* or nutritive value? or nutrient? or mineral? or Macronutrient* or micronutrient* or supplement* or trace element? or carbohydrate* or protein fat? or protein* or dietary fiber or dietary fibre)).tw,kf. | 796166 |
| 5 | Anemia, Iron-Deficiency/ or "Vitamin B 12 Deficiency"/ or "Folic Acid Deficiency"/ or (((Iron or "Vitamin B 12" or "vitamin b12" or folate or "folic acid") adj2 deficienc*) or an?emi*).tw,kf. | 206221 |
| 6 | Malnutrition/ or "Nutritional Status"/ or (malnutrition* or Undernutrition* or under-nutrition* or "Nutritional* Deficien*" or "Nutritional status*" or "Nutritional outcome*").tw,kf. | 136844 |
| 7 | or/1-6 | 1372622 |
| 8 | ((evaluat* or effica* or assessment or experiment or "propensity score matching" or "difference in differences" or "quasi experiment*" or "counterfactual evaluation?" or "instrumental variable?" or "regression discontinuity" or "time series regression" or "effectiveness" or trial*) adj4 ("model?ing stud*" or development* or impact* or "policy intervention" or "intervention mechanism?" or solution* or practice* or strateg* or polic* or response* or program* or design* or target* or measur*)).tw,kf. | 802708 |
| 9 | ("systematic review" or "literature review" or "meta analys?s" or "randomi?ed controlled trial?" or RCT?).ti,ab,pt. | 1341497 |
| 10 | (sustainab* or "climate-friendly" or "climate-resilien*" or "climate-driven" or "dietary change*" or conservation* or co-benefit* or cobenefit*).tw,kf. | 297520 |
| 11 | or/8-10 | 2283866 |
| 12 | 7 and 11 | 121090 |
| 13 | *disasters/ or ((disaster? or catastroph* or cris?s) adj5 (environment* or climate* or human or manmade or "man made" or nature or natural or weather)).tw,kf. | 29006 |
| 14 | "Greenhouse Effect"/ or "Greenhouse Gases"/ or ("greenhouse effect" or "global warming" or "Greenhouse Gas*" or (("Greenhouse Gas*" or GHG? or "carbon dioxide" or "CO2" or "CO2 equivalent*" or "nitrous oxide" or "Sulphur dioxide" or "Sulfur dioxide" or "SO2" or "NO2" or "combustion air pollution" or Chlorofluorocarbon* or trifluoride* or Methane or ammonia or nitrogen or CFC?) adj2 (increas* or level? or Atmospher*)) or (environmental adj degrad*) or "land use").tw,kf. | 98809 |
| 15 | "Climate Change"/ or Environment/ or "Hot Temperature"/ or *"Extreme Heat"/ or ((climat* or "climate-related" or "climate-driven" or environment* or Heat-related or heat or hot weather or extreme heat or "Extreme temperature?" or "Extreme Hot Weather" or "heat stress*" or global warming*) adj (impact* or security or change or emergenc* or hazard* or cris?s or shock* or adapt* or mitigat* or trend*)).tw,kf. | 356613 |
| 16 | or/13-15 | 457261 |
| 17 | 12 and 16 | 5390 |
| 18 | limit 17 to (english language and yr="2000-Current") | 5122 |
| 19 | remove duplicates from 18 | 5102 |
| 20 | (conference abstract or editorial or comment or letter or newspaper article).pt. | 2296781 |
| 21 | 19 not 20 | 5048 |

**Clarivate Web of Science Core Collection (September 10, 2024)**

| 1 | TS=(Food NEAR/2 (supply or supplies or stor* or security or quality or safety or safe or industr* or system? or insecur*)) | 261,841 |
| --- | --- | --- |
| 2 | TS=((diet* NEAR/3 (optimi* or status or change* or divers* or quality)) or "diet-related*") | 72,955 |
| 3 | TS=((energy or calor*) NEAR/2 intake*) | 60,077 |
| 4 | TS=(((Iron or "Vitamin B 12" or "vitamin b12" or folate or "folic acid" NEAR/2 deficienc*) or an?emi*)) | 882,069 |
| 5 | TS=(malnutrition* or Undernutrition* or under-nutrition* or "Nutritional* Deficien*" or "Nutritional status*" or "Nutritional outcome*") | 132,228 |
| 6 | TS= (food* AND (fortif* or enrich* or nutritive value? or nutrient? or mineral? or Macronutrient* or micronutrient* or supplement* or trace element? or carbohydrate* or protein fat? or protein* or dietary fiber or dietary fibre)) | 321,960 |
| 7 | #6 OR #5 OR #4 OR #3 OR #2 OR #1 | 1,587,651 |
| 8 | TS=((evaluat* or effica* or assessment or experiment or "propensity score matching" or "difference in differences" or "quasi experiment*" or "counterfactual evaluation?" or "instrumental variable?" or "regression discontinuity" or "time series regression" or "effectiveness" or trial*) AND ("model?ing stud*" or development* or impact* or "policy intervention" or "intervention mechanism?" or solution* or practice* or strateg* or polic* or response* or program* or design* or target* or measur*)) | 10,276,194 |
| 9 | TS=("systematic review" or "literature review" or "meta analys?s" or "randomi?ed controlled trial?" or RCT?) | 849,521 |
| 10 | TS=(sustainab* or "climate-friendly" or "climate-resilien*" or "climate-driven" or "dietary change*" or conservation* or co-benefit* or cobenefit*) | 1,389,537 |
| 11 | #10 OR #9 OR #8 | 11,818,922 |
| 12 | #11 AND #7 | 358,166 |
| 13 | TS=((disaster? or catastroph* or cris?s) AND (environment* or climate* or human or manmade or "man made" or nature or natural or weather)) | 155,079 |
| 14 | TS=("greenhouse effect" or "global warming" or "Greenhouse Gas*" or (("Greenhouse Gas*" or GHG? or "carbon dioxide" or "CO2" or "CO2 equivalent*" or "nitrous oxide" or "Sulphur dioxide" or "Sulfur dioxide" or "SO2" or "NO2" or "combustion air pollution" or Chlorofluorocarbon* or trifluoride* or Methane or ammonia or nitrogen or CFC?) AND (increas* or level? or Atmospher*)) or (environmental NEAR/1 degrad*) or "land use") | 1,183,243 |
| 15 | TS=((climat* or "climate-related" or "climate-driven" or environment* or Heat-related or heat or hot weather or extreme heat or "Extreme temperature?" or "Extreme Hot Weather" or "heat stress*" or global warming*) AND (impact* or security or change or emergenc* or hazard* or cris?s or shock* or adapt* or mitigat* or trend*)) | 2,944,260 |
| 16 | #13 OR #14 OR #15 | 3,879,113 |
| 17 | #12 AND #16 | 70,452 |
| 18 | #12 AND #16 and 2000 or 2025 or 2024 or 2023 or 2022 or 2021 or 2020 or 2019 or 2018 or 2017 or 2016 or 2015 or 2014 or 2013 or 2012 or 2011 or 2010 or 2009 or 2008 (Publication Years) and Article (Document Types) and English (Languages) | 4,366 |
| 19 | ALL=(conference abstract or editorial or comment or letter or newspaper article) | 7,719,067 |
| 20 | #18 NOT #19 | 4,322 |

**Elsevier- SCOPUS (September 10, 2024)**

N=5103

( ( TITLE-ABS-KEY ( ( climat* OR "climate-related" OR "climate-driven" OR environment* OR heat-related OR heat OR "hot weather" OR "extreme heat" OR "Extreme temperature?" OR "Extreme Hot Weather" OR "heat stress*" OR "global warming*" ) W/1 ( impact* OR security OR change OR emergenc* OR hazard* OR cris?s OR shock* OR adapt* OR mitigat* OR trend* ) ) ) OR ( TITLE-ABS-KEY ( "greenhouse effect" OR "global warming" OR "Greenhouse Gas*" OR ( ( "Greenhouse Gas*" OR ghg? OR "carbon dioxide" OR "CO2" OR "CO2 equivalent*" OR "nitrous oxide" OR "Sulphur dioxide" OR "Sulfur dioxide" OR "SO2" OR "NO2" OR "combustion air pollution" OR chlorofluorocarbon* OR trifluoride* OR methane OR ammonia OR nitrogen OR cfc? W/2 increas* OR level? OR atmospher* ) ) OR ( environmental W/1 degrad* ) OR "land use" ) ) OR ( TITLE-ABS-KEY ( ( disaster? OR catastroph* OR cris?s ) W/5 ( environment* OR climate* OR human OR manmade OR "man made" OR nature OR natural OR weather ) ) ) ) AND ( ( TITLE-ABS-KEY ( sustainab* OR "climate-friendly" OR "climate-resilien*" OR "climate-driven" OR "dietary change*" OR conservation* OR co-benefit* OR cobenefit* ) ) OR ( TITLE-ABS-KEY ( "systematic review" OR "literature review" OR "meta analys?s" OR "randomi?ed controlled trial?" OR rct? ) ) OR ( TITLE-ABS-KEY ( ( evaluat* OR effica* OR assessment OR experiment OR "propensity score matching" OR "difference in differences" OR "quasi experiment*" OR "counterfactual evaluation?" OR "instrumental variable?" OR "regression discontinuity" OR "time series regression" OR "effectiveness" OR trial* W/4 "model?ing stud*" OR development* OR impact* OR "policy intervention" OR "intervention mechanism?" OR solution* OR practice* OR strateg* OR polic* OR response* OR program* OR design* OR target* OR measur* ) ) ) ) AND ( ( TITLE-ABS-KEY ( malnutrition* OR undernutrition* OR under-nutrition* OR "Nutritional* Deficien*" OR "Nutritional status*" OR "Nutritional outcome*" ) ) OR ( TITLE-ABS-KEY ( ( ( iron OR "Vitamin B 12" OR "vitamin b12" OR folate OR "folic acid" ) W/2 deficienc* ) OR an?emi* ) ) OR ( TITLE-ABS-KEY ( food* W/3 ( fortif* OR enrich* OR "nutritive value?" OR nutrient? OR mineral? OR macronutrient* OR micronutrient* OR supplement* OR "trace element?" OR carbohydrate* OR "protein fat?" OR protein* OR "dietary fiber" OR "dietary fibre" ) ) ) OR ( TITLE-ABS-KEY ( ( energy OR calor* ) W/2 intake* ) ) OR ( TITLE-ABS-KEY ( ( diet* W/3 ( optimi* OR status OR change* OR divers* OR quality ) ) OR "diet-related*" ) ) OR ( TITLE-ABS-KEY ( food W/2 ( supply OR supplies OR stor* OR security OR quality OR safety OR safe OR industr* OR system? OR insecur* ) ) ) ) AND PUBYEAR > 1999 AND PUBYEAR < 2025 AND ( LIMIT-TO ( DOCTYPE , "ar" ) ) AND ( LIMIT-TO ( LANGUAGE , "English" ) )

**WHO Global Index Medicus September 11, 2024**

N=640

((Food and (supply or supplies or stor* or security or quality or safety or safe or industr* or system? or insecur* or fortif* or enrich* or "nutritive value?" or nutrient? or mineral? or Macronutrient* or micronutrient* or supplement* or "trace element?" or carbohydrate* or "protein fat?" or protein* or "dietary fiber" or "dietary fibre")) ) AND (((climat* or "climate-related" or "climate-driven" or environment* or Heat-related or heat or hot weather or "extreme heat" or "Extreme temperature?" or "Extreme Hot Weather" or "heat stress*" or "global warming*") and (impact* or security or change or emergenc* or hazard* or cris?s or shock* or adapt* or mitigat* or trend*))    )

(Food and (supply or supplies or stor* or security or quality or safety or safe or industr* or system? or insecur* or fortif* or enrich* or "nutritive value?" or nutrient? or mineral? or Macronutrient* or micronutrient* or supplement* or "trace element?" or carbohydrate* or "protein fat?" or protein* or "dietary fiber" or "dietary fibre"))

## 2.3: Grey literature - detailed search strategy

To identify relevant grey literature, we searched the following databases (some of which contain both published and grey literature):

1. CABI Digital Library
2. Grey Literature Report
3. IMMANA Grantee Database
4. 3ie Development Evidence Portal

Lastly, we searched the following organizational websites:

1. Abdul Latif Jameel Poverty Action Lab (J-PAL)
2. African Development Bank (AfDB)
3. Alliance of Bioversity International & CIAT
4. Asian Development Bank (ADB)
5. Center for Global Development (CGDev)
6. CGIAR
7. ENN-Network
8. Food and Agriculture Organization of the United Nations (FAO)
9. Inter-American Development Bank
10. International Fund for Agricultural Development (IFAD)
11. International Food Policy Research Institute (IFPRI)
12. International Livestock Research Institute (ILRI)
13. Nutrition International
14. Oxfam Policy & Practice
15. United Nations Development Programme (UNDP)
16. United Nations Children’s Fund (UNICEF)
17. U.S. Agency for International Development (USAID)
18. World Bank
19. World Food Programme (WFP)
20. World Resources Institute (WRI)

| **Website** | **Process** | **Documents retrieved** | **Date** |
| --- | --- | --- | --- |
| **Databases** | | | |
| CABI Digital Library | Advanced search page was accessed (<https://www.cabidigitallibrary.org/search/advanced>)  Search query: “ab:(climate OR "climate change" OR adaptation OR mitigation) AND ab:(nutrition OR "food security" OR diet*) AND ab:(evaluation OR intervention OR trial OR effectiveness)”  Dates: Jan 2000 – December 2024  Filters: Grey literature (CABI-curated search filter), English language  Results: 1,144 abstract records, 82 articles/chapters | 1,129 abstract records and  82 articles/ chapters    1,211 records saved to .ris files for screening | Oct 23, 2024 |
| EconLit | Not accessible – requires subscription |  |  |
| Grey Literature Report | New York Academy of Medicine library search was used to access grey lit report content (available through 2016) (<https://catalog.nyam.org/cgi-bin/koha/opac-search.pl> )  Advanced search: Title: climate OR "climate change" OR adaptation OR mitigation AND Title: nutrition OR "food security" OR "food insecurity" OR diet*  Limit to: Grey literature  Dates: 2000-2024  Language: English    Search returned 3 results, 1 of which was deemed relevant | 1 record | Oct 16, 2024 |
| 3ie Development Evidence Portal | Advanced search was used at <https://developmentevidence.3ieimpact.org/>  abstract:("climate change" OR adaptation OR mitigation) AND abstract:(nutrition OR "food security" OR diet*)  Filters: Study type: Impact Evaluations; Systematic Reviews    [Search](https://developmentevidence.3ieimpact.org/search-results?search_query=eyJzZWFyY2hfdGV4dCI6IiIsInBhZ2UiOjEsInNvcnRfYnkiOiJyZWxldmFuY2UiLCJ1c2VyUXVlcnkiOiJhYnN0cmFjdDooXCJjbGltYXRlIGNoYW5nZVwiIE9SIGFkYXB0YXRpb24gT1IgbWl0aWdhdGlvbikgQU5EIGFic3RyYWN0OihudXRyaXRpb24gT1IgXCJmb29kIHNlY3VyaXR5XCIgT1IgZGlldCopIiwiaW5pdGlhbEZpbHRlciI6eyJ0eXBlIjoiQWJzdHJhY3QiLCJ2YWx1ZSI6IlwiY2xpbWF0ZSBjaGFuZ2VcIiBPUiBhZGFwdGF0aW9uIE9SIG1pdGlnYXRpb24ifSwib3B0aW9uYWxGaWx0ZXJzIjpbeyJsb2dpY09wZXJhdG9yIjoiQU5EIiwidHlwZSI6IkFic3RyYWN0IiwidmFsdWUiOiJudXRyaXRpb24gT1IgXCJmb29kIHNlY3VyaXR5XCIgT1IgZGlldCoifV19&page=1&per_page=50&sort_by=relevance&filters=eyJwcm9kdWN0X3R5cGUiOlsic3JyIiwiaWVyIl0sInNlY3Rvcl9uYW1lIjpbXSwiY29udGluZW50cyI6W10sInRocmVlaWVfZnVuZGVkIjpbXSwidGhyZWVpZV9wcm9kdWNlZCI6W10sImZjdl9zdGF0dXMiOltdLCJjb3VudHJpZXMiOltdLCJlcXVpdHlfZGltZW5zaW9uIjpbXSwicHJpbWFyeV90aGVtZSI6W10sImVxdWl0eV9mb2N1cyI6W10sInllYXJfb2ZfcHVibGljYXRpb24iOltdLCJkYXRhc2V0X2F2YWlsYWJsZSI6W10sInByaW1hcnlfZGFjX2NvZGVzIjpbXSwidW5fc2RnIjpbXSwicHJpbWFyeV9kYXRhc2V0X2F2YWlsYWJpbGl0eSI6W10sInByZV9yZWdpc3RyYXRpb24iOltdLCJpbnRlcnZlbnRpb25zIjpbXSwib3V0Y29tZSI6W10sImV2YWx1YXRpb25fbWV0aG9kIjpbXSwiY29uZmlkZW5jZV9sZXZlbCI6WyJNZWRpdW0iLCJMb3ciXX0=) returned 69 results (61 impact evaluations, 8 systematic reviews) | 69 records    Saved for screening | Oct 23, 2024 |
| IMMANA Research Outputs | Accessed the Research Outputs area of IMMANA webpage <https://www.anh-academy.org/immana/research-outputs>  Scanned through the following sections for relevant publications:   - Journal articles - Working and technical papers - Case studies   Used keyword search for climate and nutrition-related terms. Opened links to potentially relevant publications to read abstract or record description. No relevant records were found. | 0 records | Oct 16, 2024 |
| **Organizational websites** | | | |
| Abdul Latif Jameel Poverty Action Lab (J-PAL) | Evaluations page accessed (<https://www.povertyactionlab.org/evaluations> )  Search terms: (climate OR "climate change" OR adaptation OR mitigation) AND (nutrition OR "food security" OR diet)  Filters applied: Status (completed) ([link](https://www.povertyactionlab.org/evaluations?search_api_fulltext=(climate%20OR%20%22climate%20change%22%20OR%20adaptation%20OR%20mitigation)%20AND%20(nutrition%20OR%20%22food%20security%22%20OR%20diet)&sector=All&intervention_type=All&country=All&status=Completed&region=All&target_group=All&outcome_of_interest=All&page=26))  212 results, displayed 8 per page, no ability to download all – all 212 result titles and short descriptions was screened to identify relevant results. Potentially relevant results were opened in new tab, and abstract, relevant outcomes, and sectors were screened. Keyword search was used to look for climate- and nutrition-related keywords. No relevant results were found.    Another search strategy was implemented to try to identify relevant results. Among all completed evaluations, different combinations of relevant sectors (Health, Social protection, Agriculture, Environment energy and climate change), we search for results with different outcomes of interest (Nutrition, Food security, Nutrition and food security, Climate change, Climate change adaptation, Climate change mitigation, Anemia). No relevant results were found. | 0 records | Oct 23, 2024 |
| African Development Bank (AfDB) | Accessed the AfDB Publications page (<https://www.afdb.org/en/knowledge/publications> ). The following categories of publications were selected as potentially relevant: Working Paper Series and Policy Research Document Series.    For the Working Paper Series, 319 titles were screened with the aid of keyword searches for nutrition- and climate relevant papers. Only English titles were considered. 18 records were opened and their abstracts screened. 2 records were found to be relevant.    For the Policy Research Document Series, 5 titles were screened for relevance. No relevant results were found. | 2 records | Oct 23, 2024 |
| Alliance of Bioversity International & CIAT | The Publications and Data page was accessed. The search box was used with the following search terms: climate nutrition evaluation ([results link](https://alliancebioversityciat.org/publications-data?search_api_fulltext=climate%20nutrition%20evaluation)). The following publication types were screened: Brief, Case Study, Report, and Working Paper. 11 records were opened for abstract screening. 4 records were found to be relevant.    An additional search for climate nutrition and Report publication types yielded an additional 3 relevant records. | 8 records | Oct 23, 2024 |
| Asian Development Bank (ADB) | The Publications and Documents page was accessed (<https://www.adb.org/publications> ). Over 13k results exists. In order to filter results, we selected publication subtype Papers and Briefs, and the subject Climate change. Keywords ‘nutrition food’ were entered in the search box. [This search](https://www.adb.org/search0/subject/climate-change/subtype/papers-and-briefs-1025?keywords=nutrition%20food) yielded 22 results. Titles and abstracts were screened for relevance. 1 record was found to be relevant.    In addition, [Economic Working Papers](https://www.adb.org/publications/series/economics-working-papers?page=9) were searched – the titles of the first 100 of 743 records were screened for relevance. No relevant records were found. | 1 record | Oct 23, 2024 |
| Center for Global Development (CGDev) | The Research page was accessed (<https://www.cgdev.org/section/publications> ). Multiple searches were conducted. First, the search box was used with the following terms: “climate change” nutrition, which yielded 9 records. The titles were screened and none were found to be relevant ([results link](https://www.cgdev.org/section/publications?search_api_fulltext=%22climate%20change%22%20nutrition&sort_bef_combine=published_at_DESC&page=0)).    An additional search for “climate change” food yielded 74 results, which were filtered by the publication types: policy papers (3), reports (1) and working papers (2). No relevant records were found.    Lastly, a search for climate working papers yielded 62 results. Titles were screened for relevance and no relevant records were found. | 0 records | Oct 23, 2024 |
| CGIAR | CGIAR Publications page was accessed (<https://www.cgiar.org/research/publications/> ).  A keyword search for ‘nutrition evaluation’ was conducted for publications under the research theme ‘Climate adaptation & mitigation’. Titles were screened for relevance. 1 relevant record was found. An additional keywork search for ‘food security’ under the ‘Climate adaptation & mitigation’ theme was conducted. 4 relevant records were found.    For the ‘Nutrition’ and ‘Nutrition, health and food security’ themes, keyword searches for ‘climate’, climate evaluation, climate effectiveness were conducted. Result titles were screened for relevance, and potentially relevant records were opened to screen abstracts. 8 relevant records were found. | 12 records | Oct 23, 2024 |
| Emergency Nutrition Network (ENN) | The ENN Resources page was accessed (<https://www.ennonline.net/enn-resources> ). Under theme, we selected ‘climate change,’ which yielded 3 records. Record titles and abstracts were screened for relevance and no relevant records were found. | 0 records | Oct 24, 2024 |
| Food and Agriculture Organization of the United Nations (FAO) | The Publications page was accessed (<https://www.fao.org/publications/en/> ). The [FAO Publications catalogue 2024](https://openknowledge.fao.org/items/3af1a8e9-1619-4deb-9cd6-eebea70f590e) was opened. Titles and descriptions in the climate change, and nutrition sections were screened. 7 relevant records were found.    The [FAO Investment Centre Publications](https://www.fao.org/investment-centre/publications/en) page was accessed. Keyword searches for “climate nutrition” and “climate food” were conducted. Results were screened for relevance.1 relevant record was found.    The [FAO Knowledge Repository](https://openknowledge.fao.org/home) was accessed. Keyword searches for “"climate change" "nutrition" evaluation” and “"climate change" "nutrition" impact” were conducted, applying filters for years of publication (since 2000) and language (English). The titles of the first 200 results of each search were screened for relevance. Potentially relevant articles were opened and their abstract screened for relevance. No relevant records were found. | 8 records | Oct 24, 2024 |
| Inter-American Development Bank | The IDB Publications page was accessed (<https://publications.iadb.org/en/publications> ). Searches for the keywords “climate nutrition” and “climate food” were conducted. Titles and descriptions of search results were screened. Potentially relevant results were opened to screen the record abstract. No relevant records were found. | 0 records | Oct 24, 2024 |
| International Fund for Agricultural Development (IFAD) | The IFAD Knowledge and Data page was accessed, under which ‘Research’ was selected (<https://www.ifad.org/en/research> ). Under ‘Theme,’ ‘Climate change’ was selected, yielding 45 results. In addition, under the ‘Nutrition’ theme, 34 results were screened, and under the ‘Food systems’ theme, 19 results were screened. 0 results appeared under the ‘Food security’ theme. Record titles were screened for relevance, and potentially relevant titles were opened in a new page to screen the abstract. 9 relevant records were found. | 9 records | Oct 28, 2024 |
| International Food Policy Research Institute (IFPRI) | The IFPRI Publications page was accessed (<https://www.ifpri.org/publications> ). A search for Book Chapters, Journal Articles, Reports, Other, and Working Papers under the keyword ‘climate change’ was conducted, with additional nutrition-related keywords selected from the filter menu (e.g., maternal nutrition, malnutrition, healthy diets, dietary diversity, food security). The [search](https://www.ifpri.org/publications/search/?resourceText=climate+change&resourcesRepository=d7&searchType=send&joinOperator=and&searchField=allfields&searchOperator=is&collectionID=&numberRecords=100&apiPaging=0) yielded 23 results. Titles were screened for relevance, and the abstracts of potentially relevant titles were screened. Similar searches were conducted for the topics ‘climate change adaptation’ and ‘climate change mitigation’. 5 relevant records were found.    In addition, a [search](https://www.ifpri.org/publications/search/?joinOperator=OR&searchField=keyword&searchOperator=contains&resourceText=nutrition+climate&resourcesRepository=cdm&searchType=send&collectionID=p15738coll2%21p15738coll5&numberRecords=50&apiPaging=0) for the terms ‘nutrition climate’ was conducted, and results were filtered for the publication types: Book Chapters, Discussion Papers, Journal Articles, and Reports, which yielded 50 results. A similar search for the terms ‘climate food security; was conducted. 1 relevant record was found.    Lastly, separate searches for ‘nutrition’ and ‘food security’ were conducted, with additional climate-related keywords selected from the filter menu (e.g., climate, climate change). 2 relevant records were identified. | 8 records | Oct 31, 2024 |
| International Livestock Research Institute (ILRI) | The ILRI Publications page was accessed (<https://www.ilri.org/knowledge/publications> ). Under the impact area ‘Climate adaptation and mitigation’, the keywords ‘nutrition’ and ‘food security’ were searched together and separately. In addition, under the impact area ‘Nutrition, health and food security,’ the keyword ‘climate change’ was searched. Titles were screened for relevance, and the abstracts of potentially relevant titles were screened. 5 relevant records were identified. | 5 records | Oct 31, 2024 |
| Nutrition International (NI) | The NI Learning Resources page was accessed (<https://www.nutritionintl.org/learning-resources-home/>). A search for ‘climate’ was conducted, which yielded 1 result. No relevant records were found. | 0 records | Oct 31, 2024 |
| Oxfam Policy & Practice | The Resources page of Oxfam Policy & Practice was accessed (<https://policy-practice.oxfam.org/resources/>). The subject ‘Climate change’ was selected, and the publication type ‘Research report’, which yielded 48 results. Titles were screened for relevance, and the abstracts of potentially relevant titles were then screened. 3 relevant records were identified.    The subject ‘Food and livelihoods’ was selected, and the publication type ‘Research report’, which yielded 125 results. Titles were screened for relevance, and the abstracts of potentially relevant titles were then screened. 0 relevant records were identified. | 3 records | Oct 31, 2024 |
| United Nations Development Programme (UNDP) | UNDP publications site was accessed (<https://www.undp.org/publications>). Under the topic ‘Climate change and disaster risk reduction,’ the subtopics ‘adaptation’ and ‘mitigation’ were selected, yielding 152 results. Titles were screened for relevance, and the abstracts of potentially relevant titles were then screened. 1 relevant record was identified.    In addition, under the topic ‘Sustainable’ the subtopic ‘Food security’ was selected, yielding 34 results. Titles were screened for relevance, and the abstracts of potentially relevant titles were then screened. 2 relevant records were identified. | 3 records | Oct 31, 2024 |
| United Nations Children’s Fund (UNICEF) | The UNICEF Publications page was accessed (<https://www.unicef.org/reports>). A search with the filter by topic ‘Climate change’ was conducted, and result titles were screened for relevance, and the abstracts of potentially relevant titles were then screened. 0 relevant records were identified.    A search with the filter by topic ‘Nutrition’ was conducted, and result titles were screened for relevance, and the abstracts of potentially relevant titles were then screened. 0 relevant records were identified.    The Innocenti – Global Office of Research and Foresight reports page was accessed (<https://www.unicef.org/innocenti/reports/view-all>). The keywords ‘climate AND nutrition’ were entered in the search box, yielding 90 results. Titles were screened for relevance, and the abstracts of potentially relevant titles were then screened. 1 relevant record was found. | 1 record | Oct 31, 2024 |
| U.S. Agency for International Development (USAID) | The USAID Nutrition Resource Hub was accessed (<https://www.advancingnutrition.org/resources/nutrition-resource-hub> ). The search box was used to search for ‘climate.’ The search yielded 5 results, which were screened for relevance. 5 relevant records were found. | 5 records | Oct 24, 2024 |
| World Bank | The World Bank Open Knowledge Repository was opened (<https://openknowledge.worldbank.org/>). A [search](https://openknowledge.worldbank.org/search?query=(%22climate%20change%22%20OR%20adaptation%20OR%20mitigation)%20AND%20(nutrition%20OR%20food%20security%20OR%20diets)&f.supportedlanguage=en,equals&spc.page=1&spc.rpp=100&showCitations=true) for ("climate change" OR adaptation OR mitigation) AND (nutrition OR food security OR diets), with results in English yielded 3,344 results. The first 300 result titles were screened for relevance, and the abstracts of potentially relevant titles were then screened. 9 relevant records were identified.    An additional [search](https://openknowledge.worldbank.org/communities/06251f8a-62c2-59fb-add5-ec0993fc20d9?spc.sf=dc.date.issued&spc.sd=DESC&query=climate%20nutrition%20food%20security&scope=06251f8a-62c2-59fb-add5-ec0993fc20d9) of Working Papers was conducted with the keywords ‘climate nutrition food security’, which yielded 110 results. All result titles were screened for relevance, and the abstracts of potentially relevant titles were then screened. 4 relevant records were identified.    An additional [search](https://openknowledge.worldbank.org/communities/b169ca02-35ba-55e5-b098-a96beabd1ba7?spc.sf=dc.date.issued&spc.sd=DESC&query=climate%20nutrition%20food%20security&scope=b169ca02-35ba-55e5-b098-a96beabd1ba7) of Technical was conducted with the keywords ‘climate nutrition food security’, which yielded 8 results. All result titles were screened for relevance, and the abstracts of potentially relevant titles were then screened. 1 relevant record was identified.    Lastly, a [search](https://openknowledge.worldbank.org/communities/8a3586f1-821e-5f32-93f3-62dd37db1685?spc.sf=dc.date.issued&spc.sd=DESC&query=climate%20nutrition&scope=8a3586f1-821e-5f32-93f3-62dd37db1685&spc.page=2) of Journals was conducted with the keywords ‘climate nutrition, which yielded 18 results. All result titles were screened for relevance, and the abstracts of potentially relevant titles were then screened. 1 relevant record was identified. | 15 records | Oct 31, 2024 |
| World Food Programme (WFP) | The WFP publications page was accessed (<https://www.wfp.org/publications>). Keyword searches were conducted for different combinations of ‘climate’, ‘nutrition’ and ‘food security,’ also using the topic filters for ‘Climate change adaptation’ and ‘Nutrition’. Result titles were screened for relevance, and the abstracts of potentially relevant titles were then screened. 9 relevant records were found. | 9 records | Oct 31, 2024 |
| World Resources Institute | The WRI Resources page was accessed (<https://www.wri.org/resources>). Under the ‘Food’ topic, the keywords ‘climate nutrition’ were searched, along with the filter for type of resources for research and technical perspectives, which yielded 37 results. Titles were screened for relevance, and the abstracts of potentially relevant titles were then screened. 6 relevant records were found.    Under the ‘Climate’ topic, the keywords ‘climate nutrition’ were searched, along with the filter for type of resources for research and technical perspectives, which yielded 447 results. Subtype of resource filters were applied to restrict results to case studies, expert notes, reports, and working papers, yielding 276 results. Titles were screened for relevance, and the abstracts of potentially relevant titles were then screened. 0 relevant records were found. | 6 records | Oct 31, 2024 |

A total of 1,367 records were retrieved through grey literature searches.

# Supplementary Methods 3: Screening codes and guides

## 3.1: Title and abstract screening codes

- EXCLUDE
- EXCLUDE but save for future reading
- INCLUDE for second opinion
- INCLUDE on title & abstract

## 3.2: Title and abstract screening guide

| **Code** | **Guidance** |
| --- | --- |
| EXCLUDE | Study is deemed not relevant. May not focus on human populations (e.g.: focus on plant or animal species), does not describe a potential intervention or evaluation of an intervention, the study is a comment/protocol/ erratum only (check online if abstract is missing). |
| EXCLUDE but save for future reading | Please save interesting papers that are not relevant to this review by applying this code. For example, studies on the negative impacts of climate change on nutrition are of interest. |
| INCLUDE for second opinion (maybe) | Study may be relevant, but needs to be checked. For example, a study describing climate adaptation interventions, but it is unclear whether there is a connection to human nutrition.    Please note we are taking a conservative approach, so if you are uncertain whether a study should be included, use this code to mark it as maybe. |
| INCLUDE at title and abstract | Study is deemed relevant. |

## 3.3: Full text screening codes

- NOT SCREENED - Full text unavailable
- EXCLUDE on date
- EXCLUDE on language – non-English
- EXCLUDE on publication type
- EXCLUDE on population
- EXCLUDE - no intervention
- EXCLUDE - not an evaluation
- EXCLUDE - outcome not relevant
- EXCLUDE - no climate-nutrition link
- EXCLUDE - not a systematic review
- INCLUDE - systematic review
- INCLUDE - quantitative study
- INCLUDE - qualitative study
- INCLUDE - mixed methods study
- UNSURE on inclusion
- EXCLUDE as duplicate

## 3.4: Full text screening guide

Revised: December 13, 2024

### Step by step full text screening instructions

| **Step** | **Question** | **If the answer is YES** | **If the answer is NO** |
| --- | --- | --- | --- |
| 1 | Is there a PDF attached, and does it match the EPPI record? If not, can you easily find and access the PDF online? | Move to the next question ⤶ | NOT SCREENED – Full text unavailable |
| 2 | Was the study published in 2000 or after? | Move to the next question ⤶ | EXCLUDE on date |
| 3 | Is the full text in English? | Move to the next question ⤶ | EXCLUDE on language – non-English |
| 4 | Is the study a protocol, erratum, correction, comment or viewpoint, thesis, conference abstract, or retracted paper? | EXCLUDE on publication type | Move to the next question ⤶ |
| 5 | Does the study examine non-human populations (i.e. diets of pigs/cattle/algae/fish) without an explicit human nutrition outcome (human diets, food security or nutrition outcomes)?  Does the study focus on non-generalizable human populations, such as niche human populations with uncommon nutritional patterns (i.e. elite athletes; those suffering eating disorders, etc.). | EXCLUDE on population | Move to the next question ⤶ |
| 6 | Does the study focus on an actual or modeled intervention, policy, program, or project? | Move to the next question ⤶ | EXCLUDE – no intervention |
| 7 | Is the study evaluating an intervention? | Move to the next question ⤶ | EXCLUDE – not an evaluation |
| 8 | Does the study include a relevant nutrition or climate mitigation outcome? (see ***Table 2***)  Note: climate adaptation studies should include at least one relevant nutrition-related outcome to be included | Move to the next question ⤶ | EXCLUDE – outcome not relevant |
| 9 | If the study includes a nutrition-related outcome, is there a climate linkage in the context or intervention (adaptation to climate change)?  Alternatively, if the study includes a climate mitigation-related outcome, is there a nutrition linkage through the intervention (e.g., dietary change, food fortification)? | Move to the next question ⤶ | EXCLUDE – no climate-nutrition link |
| 10 | If this is a review paper, does it qualify as a Systematic Review, with or without meta-analysis?    If not a review paper, move to the next question | INCLUDE – systematic review | EXCLUDE – not a systematic review |
| 11 | Does this study use quantitative methods to assess the effectiveness of an intervention? | INCLUDE – quantitative study | Move to the next question ⤶ |
| 12 | Does this study use qualitative methods to assess the effectiveness of an intervention? | INCLUDE – qualitative study | Move to the next question ⤶ |
| 13 | Does this study use both quantitative and qualitative methods to assess the effectiveness of an intervention? | INCLUDE – mixed methods study | Move to the next question ⤶ |
| 14 | You are unable to make a decision on whether the study should be included?  Note: add a brief description of which steps you are unsure about - you should briefly explain why you are unable to decide (e.g., unsure on evaluation, unsure on climate-nutrition linkage). | UNSURE on inclusion | Move to the next question ⤶ |
| * | Use this if you have selected an EXCLUDE code above but the study is relevant enough to check if its reference list contains any potentially relevant studies. Use the Full Text Review Code | Check references | |
| * | Only use this exclusion code if you are sure that you have seen a duplicate record. Please record the ID of the other paper in a note. | EXCLUDE as DUPLICATE | |

### Detailed full text screening criteria

#### NOT SCREENED – Full text unavailable

- Start with checking if the EPPI record matches the PDF.
- Use this code if there is no PDF attached to the EPPI record, or, the attached PDF is not related to the record in EPPI. We recommend you look for the paper online. The paper to be used for FT screening must be an exact match of the EPPI record. Use this code if you cannot find the full text or you found it but cannot access it (e.g. behind paywall). In that case, include a note with a link to where you found the study.
- You can also use this code if the PDF is not a research paper (e.g., presentation, poster, short summary or brief associated with a research). Add the check reference code along with this code.

#### EXCLUDE on date

- Studies will be included if they were published in 2000 or after.
- If there’s no publication date, google it; if the date still can’t be found, move to the next question, do not exclude with this code.
- Year of intervention should not be considered for this screening question. A study evaluating an intervention that took place before 2000 but published on or after 2000 should not be excluded.

#### EXCLUDE on language – non-English

- Studies will be included if they are published in English.
- If the study is only published in a language other than English, exclude using this code and move to the next record.

#### EXCLUDE on publication type

- Exclude protocol, erratum, correction, comment or viewpoint, thesis, conference abstract, or retracted papers using this code and move to the next record.
- Also exclude concept papers, discussion papers, and communication papers.
- We also intend to exclude full books. However, please proceed with caution, in particular for organizational reports, which maybe be categorized as books by reference management software.

#### EXCLUDE on population

- **Non-human population:** Exclude studies examining nutrition/health outcomes of non-human populations (i.e. diets of pig/cattle/bacteria/fish) without implications for human nutrition (human diets, food security or nutrition outcomes).
- **Not healthy/general pop:** Exclude studies that focus on non-generalizable human populations, such as niche human populations with uncommon nutritional patterns (i.e. elite athletes; those suffering eating disorders, etc.).
- Generalizable population sub-groups CAN include age-specific groups (i.e. children, the elderly)

#### EXCLUDE – no intervention

- The study only aims to describe the prevalence of a phenomenon (i.e. climate-related weather events) or factors associated with/predictors of a phenomenon (i.e. malnutrition related to climate-related weather events).
- To note that the research/study team does not need to be responsible for the implementation of the intervention
- Adoption as the sole outcome indicates a process evaluation, while in conjunction with relevant outcomes does not (and should be included)
- Coping mechanisms – if it could be re-analyzed and used somewhere else as part of an intervention, it should be included
  - E.g.: use of drought-resistant varieties, afforestation, green wall (anti-desertification)
  - Coping mechanism (change in behavior) needs to be analyzed as the independent variable. If it is the dependent variable, then it shouldn’t be included (similar to adoption).
  - If coping or adoption are the final outcomes, then the studies should not be included.
- What is an intervention?
  - By an “intervention” we mean a decision or set of activities deliberately undertaken by a specific entity—such as a government body, NGO, private firm, or consortium— intended to influence events or outcomes, which another such entity could emulate.
  - It may take the form of a project, program, or policy and may be implemented at any level (community, subnational, national, regional or global).
  - An experiment may be an intervention if that experiment is trying to change behaviors in real life settings.
- What is NOT an intervention?
  - Consider “no intervention” when a study’s main goal or research question is not about an intervention. Sometimes a study may mention about some activities that could be counted as interventions. But the main focus of the study might be to describe the prevalence of a risk factor or some other aspect – not the interventions. Those potential interventions were just mentioned in the background or in the discussion but are not part of the study’s main research question.
  - Activities that are not directly targeted to bring about DIRECT changes in the participants’ or the beneficiaries’ lives are not interventions. Studies may look at efficacy or usability of some measurement or diagnostic tools for example. These measurement tools cannot be considered interventions as they are designed to investigate the cause of a problem, not to solve the problem.
  - We are not interested in activities that focus on measuring, mapping, scanning or similar activities if they are not accompanied by actual treatment. For instance, a program that evaluates a tool to map climate vulnerability but does not take action to decrease that vulnerability will not be considered as interventions.
  - Studies measuring the effects of exposure to natural events such as natural disasters, conflict, trauma, disease, etc. For example studies looking at the impact of climate change on food consumption/nutrition outcomes.

#### EXCLUDE – not an evaluation

- The study is NOT looking at effectiveness, or not designed to evaluate the impact of an intervention
- The study objectives are NOT to establish an association between the intervention and outcomes of interest
- The study is NOT evaluating the effectiveness or the impacts of an intervention to establish a causal link between the intervention and one or more outcomes. Examples include:
  - Studies only describing the design or implementation of the intervention
  - Process evaluations
  - Feasibility/acceptability studies – studies that seek to understand barriers or facilitators of adoption of a particular intervention
  - Literature reviews (including systematic reviews) that do not address effectiveness
  - Studies describing prevalence of some conditions.
  - Studies monitoring a situation, event or phenomenon.
  - Studies looking at association of dependent variables (outcomes) with independent variables but not establishing causal links between them (as to how and how much the independent variables are influencing the dependent variable).
  - Cost-effectiveness studies.
  - Literature reviews (including systematic reviews) that do not synthesize or evaluate interventions.

Includable quantitative methods:

- Experimental Designs: Using randomized controlled trials (RCTs) with assignment at individual, household, community, or other cluster level, and quasi-RCTs using prospective methods of assignment to compare outcomes between a treatment group and a control group, establishing causality.
- Quasi-Experimental Designs: Employing methods like difference-in-differences (DiD), propensity score matching (PSM), regression discontinuity design (RDD), or natural experiments to estimate causal effects when randomization isn’t feasible.
- Meta-Analysis: Combining results from multiple studies to derive a pooled estimate of the effect size, enhancing the generalizability of findings.
- Statistical Modeling: Utilizing techniques such as regression analysis to identify relationships between variables and predict outcomes.
- Observational designs (such as cohort and cross-sectional studies) can be included if designed to understand the association between an intervention and outcomes of interest
- Studies where interventions impacts are modeled can be included (e.g. impact of dietary changes on GHGe) if the outcomes match our outcomes of interest and climate-nutrition linkages are present.

#### EXCLUDE – outcome not relevant

- You do not find any outcomes measured in the paper that fit our outcome list (see Table 1 below). Check the result sections, and all the tables (including annexes).
- No need to screen further, go to the next record in your batch.
- Note that climate adaptation studies should include at least one relevant nutrition-related outcome to be included

**Table 1.** Relevant climate mitigation and human nutrition outcomes. Nutrition outcomes were adapted from Sparling et al. 20222

| **Outcome** | **Category** | **Definition** |
| --- | --- | --- |
| Climate Mitigation | GHG emissions | Measures of GHG emissions including changes in amount emitted, avoided, or leaked to another area. Measures could be of individual GHGs (e.g., carbon CO2, methane CH4, nitrous oxide N2O) or aggregate measures (e.g., CO2-equivalents (CO2e) or global warming potential (GWP)). May also include measures of GHG intensity per productive unit (e.g., methane intensity in livestock production). |
| Carbon storage and sequestration | Measures of carbon stocks and flows in biomass and above and below ground organic matter. Includes both soil organic carbon (temporary sequestration) and permanent carbon elimination measures. |
| Human Nutrition | Food security | Food access at the household or individual levels, food insecurity experience measures, including indicators such as:   - Food Insecurity Experience Scale (FIES), - Household Dietary Diversity Score, - Household Food Insecurity Access Scale (HFIAS), - Household Food Security Survey (HHFS), - Household Hunger Scale (HHS), - Food Consumption Score (FCS), - Latin American and Caribbean Food Security Scale (ELCSA), - Months of Adequate Household Food Provisioning (MAHFP)   Exclude studies that measure only one of the four pillars of food security (availability, access, utilization, stability) |
| Food intake and diet quality | Intake of specific foods or food groups, dietary patterns, dietary diversity (i.e. minimum dietary diversity for women; minimum acceptable diet for children), healthy diets, dietary quality, intake of specific nutrients,   - Consumption of specific food groups (eg: cereals, fruits, vegetables, meat), - Dietary patterns (including adherence to dietary recommendations or guidelines, eg: food based dietary guidelines, or dietary patterns such as Mediterranean diets, DASH, Vegetarian), - Dietary quality, including measures such as:   - Diet Quality Score (DQS),   - Minimum Dietary Diversity (MDD),   - Individual Dietary Diversity Score (IDDS),   - Minimum Dietary Diversity For Women (MDD-W),   - Dietary Diversity Score (DDS),   - Healthy Eating Index (HEI),   - Alternative Healthy Eating Index (A-HEI)   - Global Diet Quality Score (GDQS) |
| Nutrient intakes and nutrient biomarkers | - Intake, through food or supplements, of specific micronutrients (vitamins, minerals, polyphenols, antioxidants). - Biomarkers of specific micronutrients (vitamins, minerals, polyphenols, antioxidants). These measure the levels of nutrients in biological fluids or tissues, indicating the body's nutrient stores. For example, serum ferritin levels can indicate iron status, while plasma vitamin C levels reflect vitamin C intake. - Intake or biomarkers of specific macronutrients (carbohydrates, protein, fats, fiber). |
| Nutritional status/ anthropometry | Anthropometry and body weight or BMI are used as measures of nutritional status.   - BMI (including measures for underweight, overweight and obesity) - Body composition, - Body ratios (eg, waist to hip ratio), - Thigh circumference, - Mid-upper arm circumference (MUAC), - Relative height (stunting or HAZ), - Relative weight (wasting or WHZ), - Underweight (WAZ) |
| Infant and Young Child Feeding (IYCF) | - Breastfeeding, - Child diets, - Complementary feeding, - Diet quality indicators for children:   - Minimum dietary diversity for children (MDD),   - Minimum meal frequency,   - Minimally adequate diets (MAD) |
| Fetal and birth outcomes | - Preterm birth - Birth weight, - Birth length, - Head circumference, - Small-for-gestational age (SGA), - Intra-uterine growth restriction (IUGR) - Congenital abnormalities |
| Diet-related NCDs | - Diabetes, - Heart disease, - Cardiovascular disease (CVD), - Hypertension, - Cancers, - Mycotoxin-related health outcomes |

#### EXCLUDE – no climate-nutrition link

- To be included, papers must have both climate and nutrition linkages. Some papers will have weaker linkages than others. For example, a brief description of climate change-related challenges in the introduction would be a weak linkage, while inclusion of climate-related measures in the study design would be strong. We are taking a safety-first approach to include studies even if the linkage with climate change is weak.
- We are conceptualizing linkages in the following three scenarios (**Supplementary Methods 4**):
  - 1. Nutrition-specific interventions with GHG mitigation outcomes
    2. Interventions from any sector implemented to adapt to climate change or mitigate emissions with nutrition-related outcomes
    3. Other interventions with dual climate and nutrition-related outcomes

Scenario 1:If the study includes only a climate mitigation-related outcome, it should be included if there is a nutrition linkage through the intervention (i.e. nutrition-specific interventions)

- Nutrition-specific interventions are those “that address the immediate determinants of fetal and child nutrition and development—adequate food and nutrient intake, feeding, caregiving and parenting practices, and low burden of infectious diseases”.3
- Sustainable diets should be considered under this first scenario (include if they have at least one mitigation outcome).

**Table 2:** Direct nutrition interventions or Nutrition-specific interventions (adapted from 4).

| **Health-care sector** | **Other sectors** |
| --- | --- |
| - Maternal and Child Micronutrient Supplementation: Home fortification. - Maternal and Child Food Supplementation. - Support for Early Immediate Breastfeeding Initiation. - Delayed Cord Clamping. - Promotion and Support for Exclusive and Continued Breastfeeding. - Promotion of Age-Appropriate Complementary Feeding Practices. - Management of Moderate Acute Malnutrition. - Treatment of Severe Acute Malnutrition. - Anemia Treatment. - Promotion of Healthy Diet and Physical Activity During Childhood and Adolescence. | - Iodized or Micronutrient-Fortified Salt. - Staple Food Fortification. - Biofortification and Agronomic Fortification. - Nutritional Interventions in Schools. - Nutrition in Emergency Programmes. - Mass and Social Media Messaging for Improved Nutrition. - Policies to Reduce Prices or Increase Access to Nutritious Foods and Diverse Diets. - Policies to Limit Marketing of Unhealthy Foods and Breast Milk Substitutes, Including Labeling. - Promotion of Healthy (and sustainable) Diets - Age-Appropriate Complementary Feeding in Social Protection Programmes. |

Scenario 2: If the study includes only a nutrition-related outcome, it should be included if there is a climate linkage in the study context (country context that includes climate-related changes) or intervention (adaptation to climate change).

- We consider climate change in the context (climate challenges described), intervention (i.e. climate-smart agriculture, climate adaptation interventions), or outcome (mitigation only).
- Linkages to manifestations of climate change and related environmental hazards such as droughts, wildfires, dust storms, increased precipitation, storms, floods, sea level rise, ocean acidification, extreme temperatures, and extreme weather events should also be considered as an inclusion factor.
- Adaptation interventions should describe the potential for the intervention to support adapting to climate change manifestations. Look for the keywords adaptation and resilience.
- Interventions are implemented in the context of climate change for adaptation or to increase resilience to climate change manifestations, AND include a nutrition outcome (refer to **Table 1** for outcomes of interest under each category).

Scenario 3:For all other types of interventions (outside of scenarios 1 and 2), include if:

- They have both a climate-related outcome AND a nutrition-related outcome,
- Nutrition-sensitive interventions should be considered under this scenario, and would need to have both a nutrition- and a climate-related outcome
  - **Nutrition-sensitive** interventions being those “that address the underlying determinants of fetal and child nutrition and development—food security; adequate caregiving resources at the maternal, household and community levels; and access to health services and a safe and hygienic environment—**and incorporate specific nutrition goals and actions**.”
  - Nutrition-sensitive programmes can serve as delivery platforms for nutrition-specific interventions, potentially increasing their scale, coverage, and effectiveness
  - Examples: agriculture and food security; social safety nets; early child development; maternal mental health; women’s empowerment; child protection; schooling; water, sanitation, and hygiene; health and family planning services”.3

#### EXCLUDE – not a systematic review

- The paper does not provide information on the (1) search process/source, and (2) specific inclusion/exclusion criteria how they synthesized evidence of effectiveness.
- Do not include EGMs unless they present and synthesize the effects of interventions.
- Alternatively, if the review is systematic and presents/synthesizes the effectiveness of an intervention, then use: **INCLUDE – systematic review** to include systematic reviews (with or without meta-analysis).
- Note: when relevant reviews include a search strategy, review process (similar to how it is reported in PRISMA), and specific inclusion/exclusion criteria, even when the authors do not call it a systematic review, we can include it as such.

#### INCLUDE – quantitative study

- Studies that use quantitative methods to evaluate a relevant intervention.
- Quantitative study designs include randomized control trials, cross-sectional, or cohort designs, applying quantitative evaluation methods such as fixed effects, time series analysis, regressions or modeling studies.
- Natural experiments can be included

#### INCLUDE – qualitative study

- Studies that use qualitative methods to evaluate a relevant intervention. Qualitative methods include case studies, interviews, focus group discussions.

#### INCLUDE mixed methods study

- Studies that use both qualitative and quantitative methods to evaluate an intervention.
- Note: Include studies as mixed methods even when the relevant indicators are only in the quantitative or qualitative part of the study.

#### UNSURE on inclusion

- You are unsure about the paper for any other reason. Must add notes.
- Add a brief description of which steps you are unsure about - you should briefly explain why you are unable to decide (e.g., unsure on whether the study is an evaluation, unsure on whether there are climate-nutrition linkages).
- If you are unsure on whether a nutrition outcome measure is relevant or not (for example, under food security outcomes), please add a note.

#### Check references (Full Text Review Code)

- Only use if a study looks very relevant in terms of interventions and outcomes but would be excluded based on other criteria (e.g., non-systematic review).
- Later we will check the reference lists of these studies to look for more potential studies.

#### EXCLUDE as DUPLICATE

- Duplicate records must be exact matches for all publication-related information.
- The same study can be catalogued in multiple databases. We do this deduplication before screening. Yet some duplicate records may exist in the screening batches. If you are positive that two or more studies are duplicates (title, author, year of publication and publisher must be identical), exclude it.
- If a set of duplicate studies are identified, keep the one with more bibliographic information and mark the other as duplicate.
- You MUST record the EPPI ID of the first record as a note to the one where you used the duplicate code.

# Supplementary Methods 4: Conceptualization of climate-nutrition interventions through three possible scenarios


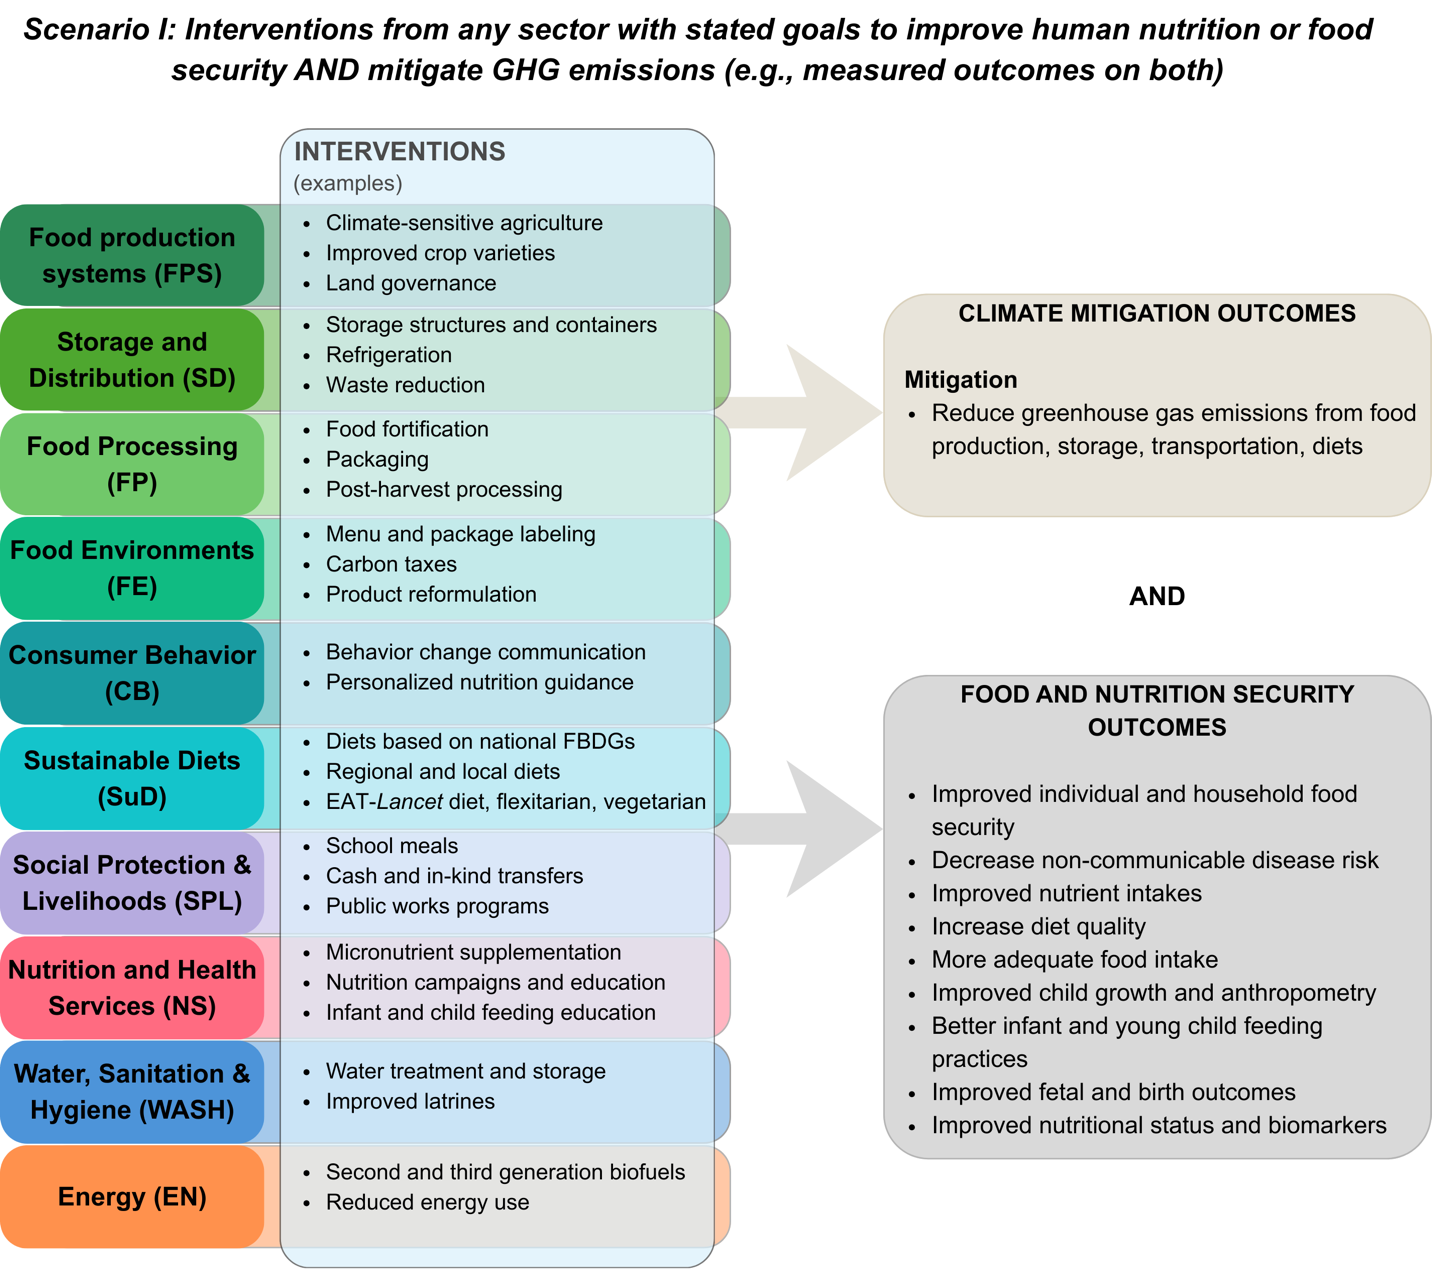


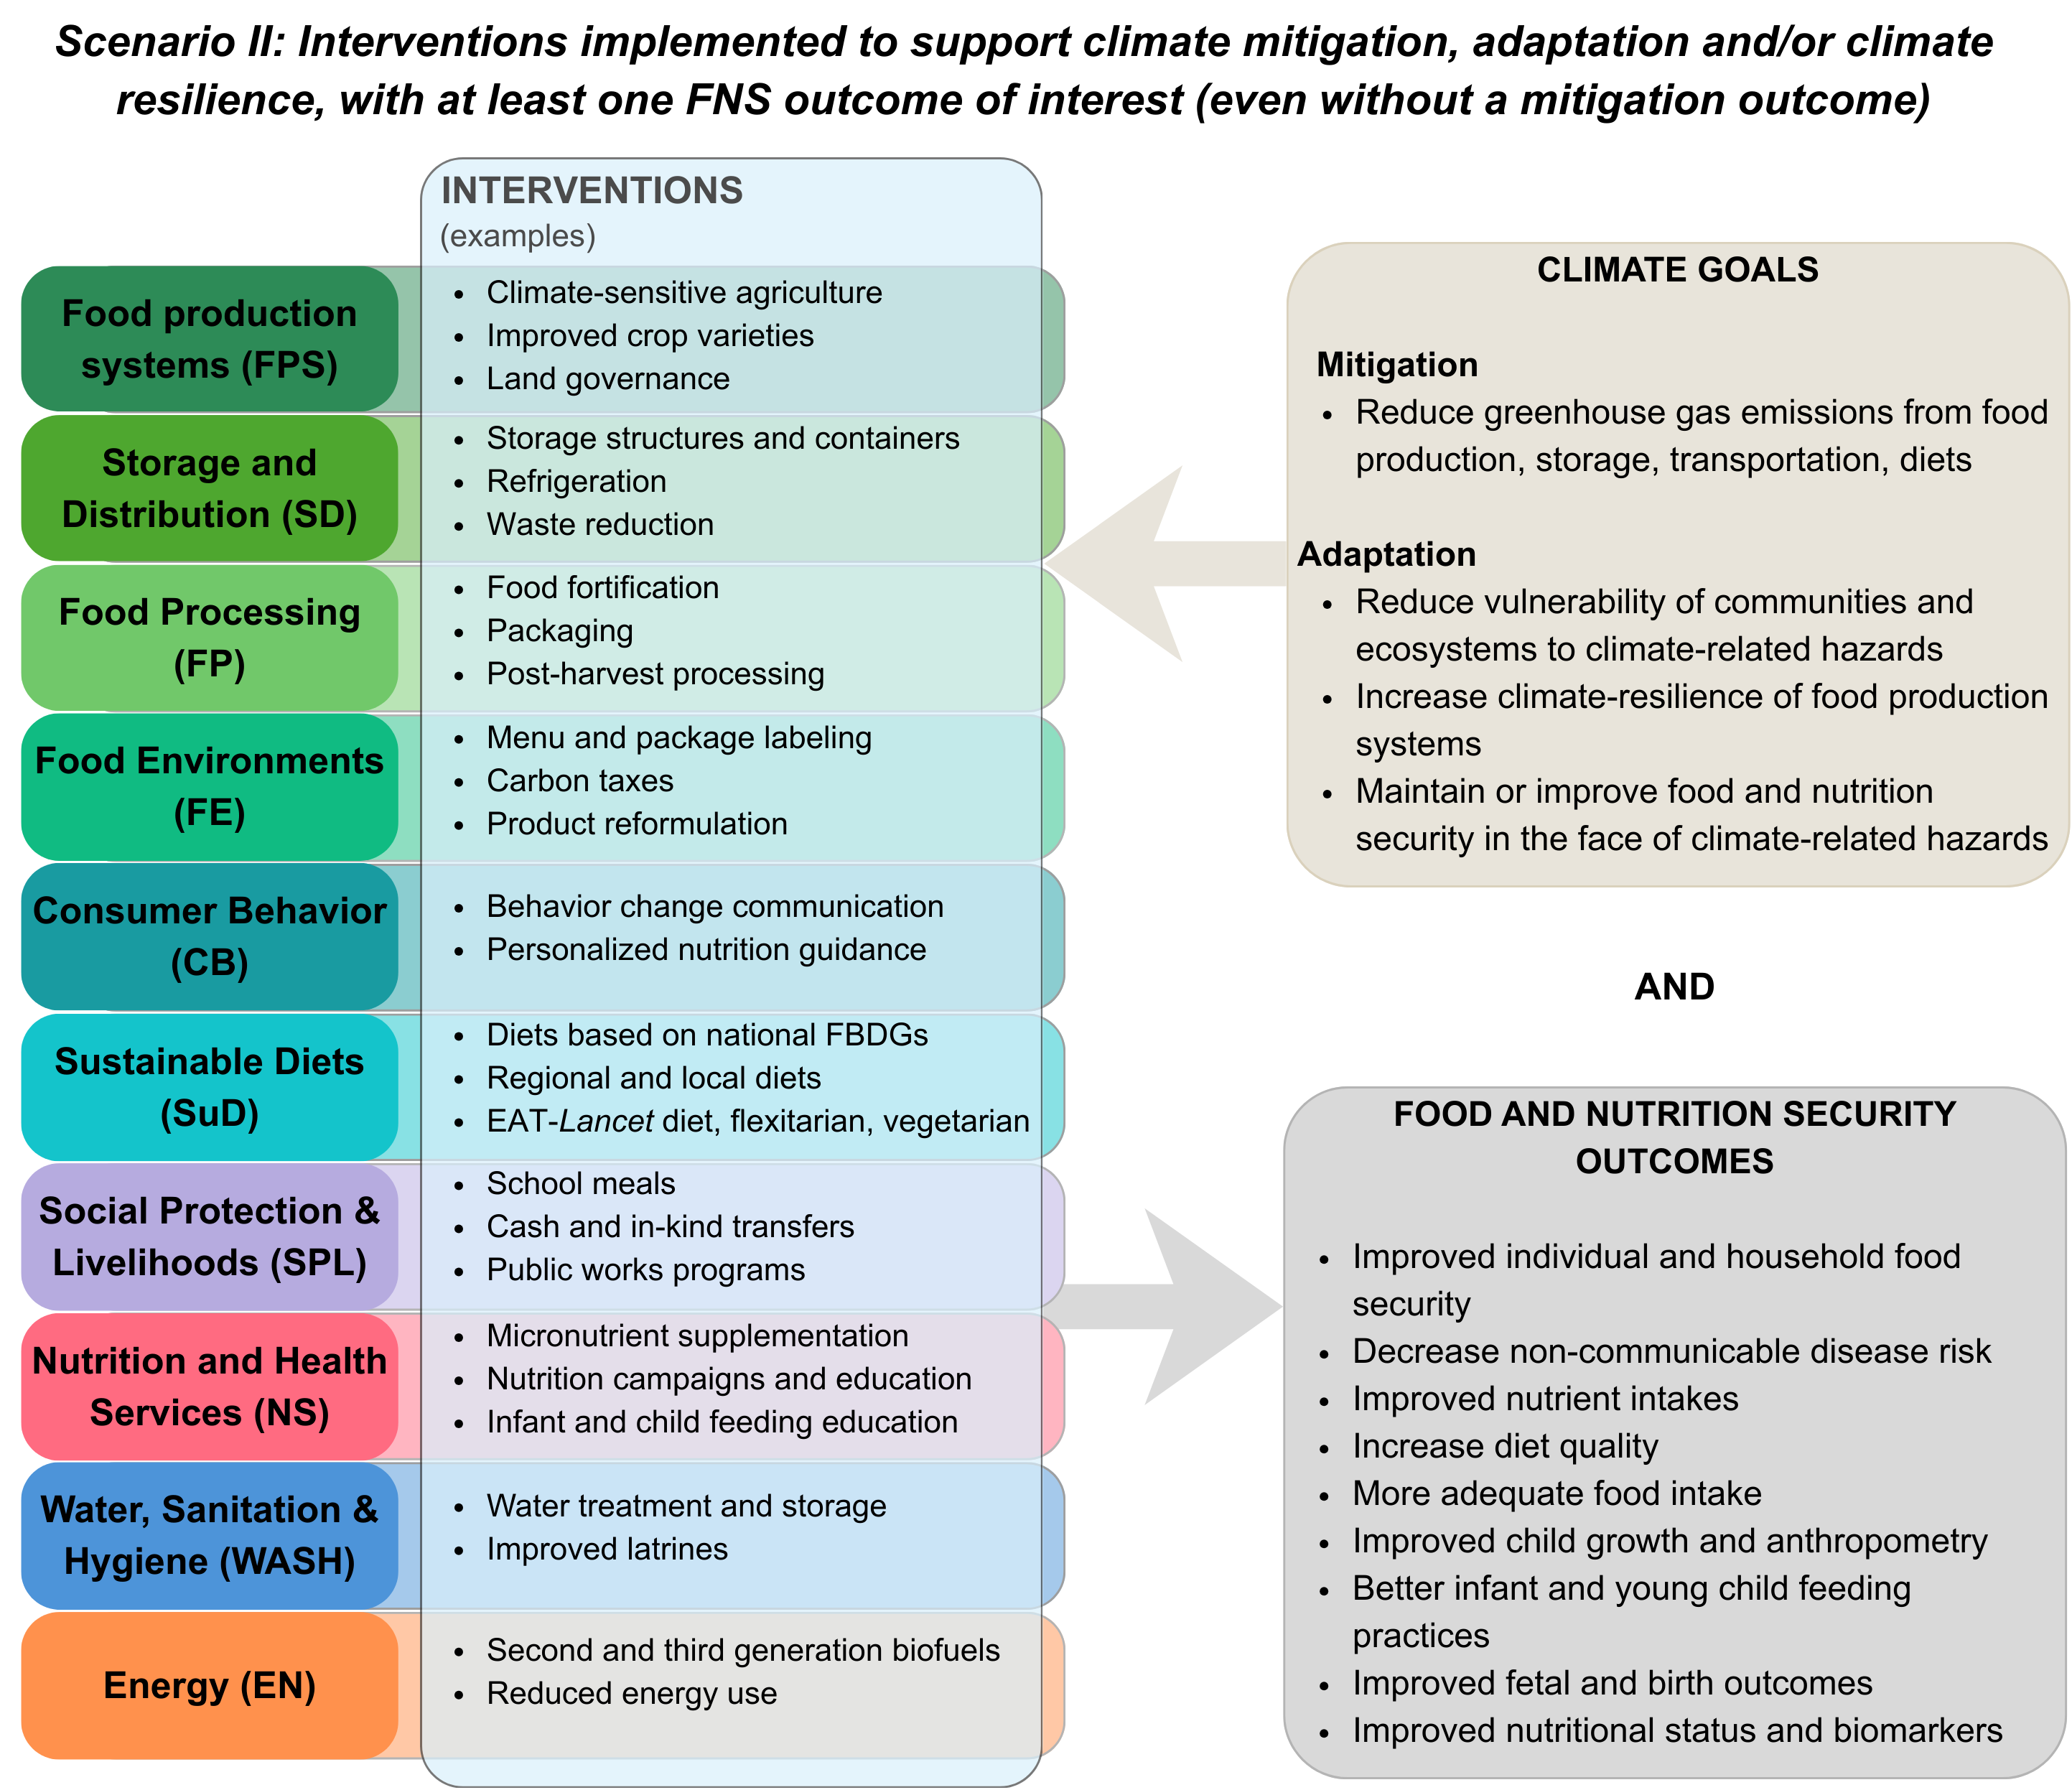


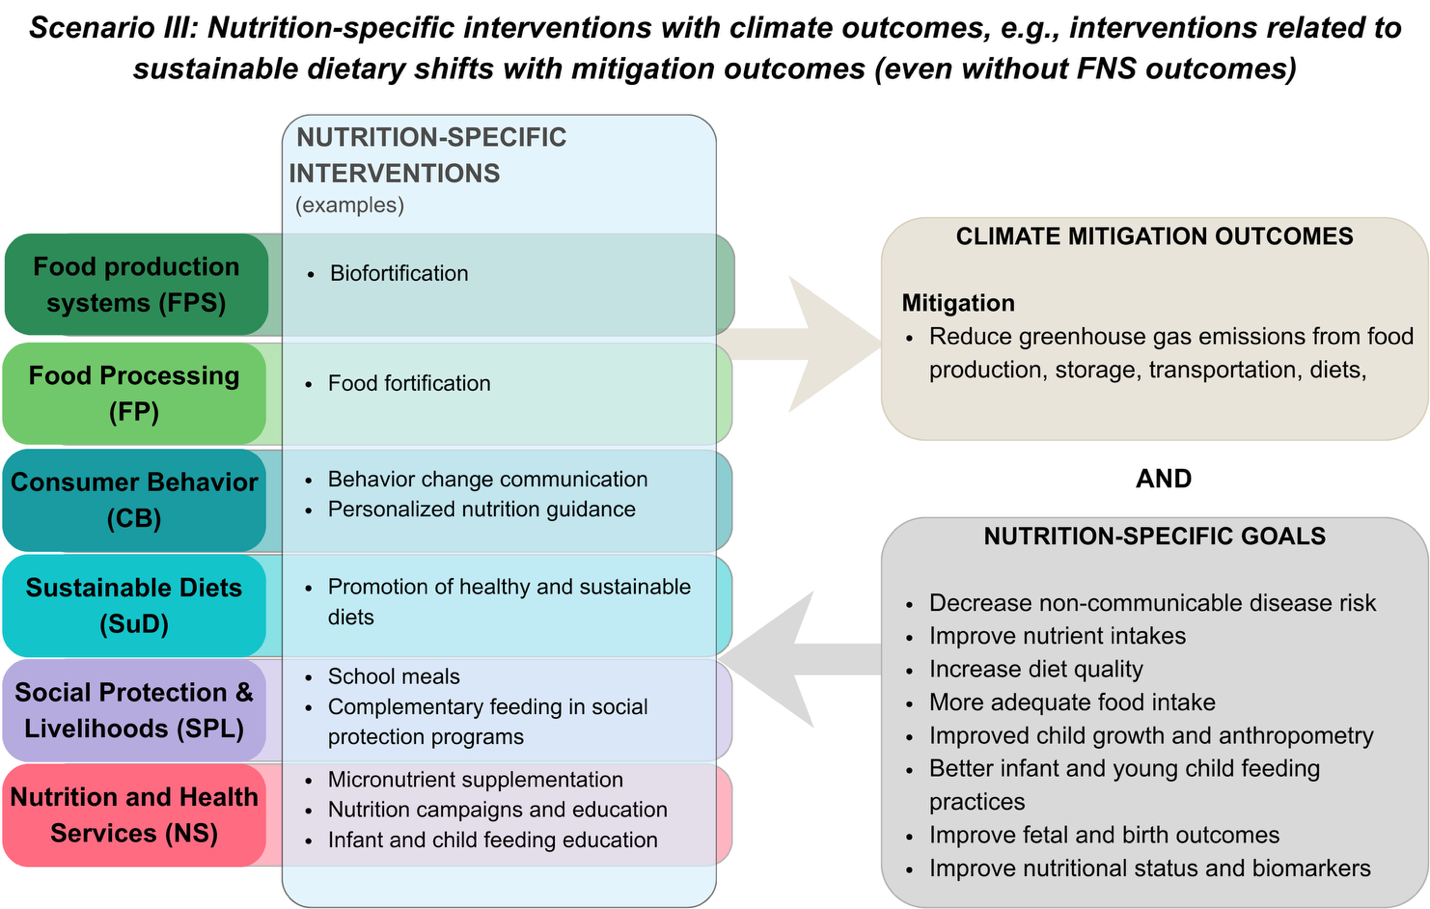


Framework adapted from FAO, *Climate Action and Nutrition - Pathways to Impact,*5 to include additional food systems areas and sectors. Post-harvest food system areas (storage and distribution, food processing, food environments) were included as gap areas. Consumer behavior interventions operate on individual factors that determine food choice and diets (including their sustainability aspects) are considered an outcome of food systems.6 The energy sector was also included. The three panels depict the three scenarios for inclusion of interventions with linkages to climate change and nutrition goals and outcomes: I. Interventions from any sector with stated goals to improve human nutrition or food security AND mitigate GHG emissions, e.g., measured outcomes on both; II. Interventions implemented to support climate mitigation, adaptation and/or climate resilience, with at least one FNS outcome of interest (even without a mitigation outcome); and III. Nutrition-specific interventions with climate outcomes, e.g., interventions related to sustainable dietary shifts with mitigation outcomes (even without FNS outcomes).FBDG, food-based dietary guidelines; FNS, food and nutrition security; GHG, greenhouse gases.

# Supplementary Methods 5: Elicit Prompts and Coding Categories

## 5.1: Elicit Prompts

Ten prompts were entered into Elicit, each designed to extract specific data from the full-text PDFs of the records that were included after screening. For each prompt (except for the one identifying country names), Elicit generated three columns: (1) the extracted data, (2) supporting quotes from the text, and (3) a rationale. The ten prompts are included below:

### 1. Country

If multiple countries or regions, list all of them. You can also say something like 'multinational' if there are multiple countries, but individual countries are not specified. Leave the answer blank if the country is not specified.

### 2. Intervention

List all interventions that at least some participants received, but do not list controls or placebos. If only some participants received a certain intervention, note that. Note the frequency and duration of the intervention. Be as precise as possible: if duration or frequency are mentioned, they need to be in the answer. If the interventions are described as being part of a category or a name, mention it (e.g.: climate-smart agriculture, or regenerative agriculture). If there are multiple components to the intervention (e.g. agricultural inputs plus education), state all of them. If there is a modeled intervention (e.g.: modeled dietary shift), state that.

### 3. Methods

Give a description of the methods used in the study. Use bullet points and remain concise. Specifically, include the following bullets:

1. Whether the study is qualitative, quantitative or mixed methods.

2. Whether the study is a systematic review and meta-analysis

3. Whether the study is an individual randomized or cluster-randomized trial

4. The methods for data collection, including use of primary or secondary cross-sectional or cohort data.

5. Analysis methods, including quasi-experimental analysis methods

6. Are the study results based on a modeled intervention or measured empirically?

### 4. Study Design

Use the following descriptions of study designs to guide the selection of the specified answers.

#### Modelling

- Use of simulations to predict intervention impacts.
- Predictive Modeling: Used in climate science to predict future scenarios based on current data.
- Nutritional Epidemiology Models: Predict the impact of dietary changes on population health outcomes.
- Simulation Models: Used in impact evaluations to predict potential effects of interventions based on existing data and assumptions.

#### Experimental

- Randomized Controlled Trials (RCTs): Participants are randomly assigned to intervention/control groups. Used in nutrition research to test dietary interventions and in climate science for field experiments like reforestation.
- Field Experiments: Assess the impact of interventions on local climates.

#### Quasi-experimental

- No Random Assignment: Participants are not randomly assigned to treatment and control groups. Instead, groups are pre-existing or assigned based on non-random criteria, such as location or demographic characteristics
- Comparison Groups: Often involves comparing a treatment group to a non-equivalent control group
- Real-World Settings: Frequently conducted in natural environments, such as schools, hospitals, or workplaces
- Causal Inference: Aims to identify causal relationships, though less robustly than true experiments
- Common types of quasi-experimental designs:
- Non-Equivalent Groups Design (NEGD): Compares outcomes between a treatment group and a control group that are not randomly assigned. Example: Comparing dietary habits and health outcomes between groups exposed to different nutritional interventions, such as a new school lunch program versus a standard one.
- Time-Series Design: Involves repeatedly measuring the outcome variable before and after the intervention to observe trends over time. Ex: Monitoring changes in nutrient intake and health markers before and after introducing a public health campaign promoting healthy eating. Tracking greenhouse gas emissions before and after implementing a new environmental regulation.
- Regression Discontinuity Design (RDD): Participants are assigned to treatment or control groups based on a predetermined cutoff score on a continuous variable. Ex: Evaluating the impact of agricultural subsidies on crop yields by comparing farms just above and below the eligibility threshold.
- Natural Experiments: Interventions occur naturally without researcher control (e.g., policies or disasters analyzed retrospectively). Occur when external factors create conditions similar to a controlled experiment. Assessing the effects of a sudden policy change, like the introduction of a new farming technique, on agricultural productivity.
- Interrupted Time-Series Design: Analyzing economic indicators before and after a major economic policy change, such as a tax reform.
- One-Group Pretest-Posttest Design: Involves measuring the outcome of a single group before and after an intervention, without a control group. Measuring the economic impact of a training program on participants' income levels before and after the intervention.
- Non-Equivalent Groups Design (NEGD): Comparing regions with and without climate adaptation measures to evaluate their effectiveness in reducing climate-related damages.

#### Cross-sectional

- Data collected at a single point in time.
- Cross-sectional Surveys: Assess the prevalence of dietary habits or nutritional status at a single point in time.
- Environmental Health Surveys: Measure the impact of climate factors on health at a specific point in time.

#### Cohort

- Repeated observations of the same participants over time.
- Prospective Cohort Studies: Follow groups over time to assess the effects of exposures like diet or pollution on health outcomes.
- Retrospective Cohort Studies: Look back at historical data to find correlations between past exposures and current health outcomes.

#### Case study

- Detailed analysis of a single intervention or setting.
- Examines a single "case" in depth (e.g., one intervention, organization, or community).
- Often aims to explore context-specific factors, mechanisms, or outcomes rather than generalizable results.
- Does not involve control or comparison groups like experimental designs.
- May include quantitative data but primarily for descriptive purposes, not hypothesis testing.
- Single-community analysis; qualitative interviews and programmatic reports form primary data sources

#### Qualitative and Mixed-Methods

- Qualitative Studies: Interviews, focus groups, or ethnographic methods to explore contextual factors.
- Mixed-Methods Studies: Combination of quantitative and qualitative approaches.

#### Specified possible answers:

1. Modelling
2. Experimental
3. Quasi-experimental
4. Cross-sectional
5. Cohort
6. Case Study
7. Qualitative or mixed methods
8. Systematic review or meta-analysis

### 5. Outcomes measured

There may be multiple outcomes or endpoints. If so, include all of them, as long as they are identified as outcomes. Include units if possible. Be as precise as possible.

### 6. Outcomes – Food security and nutrition

Give a description of the outcomes measured in the study. Use bullet points and be specific about the outcome measures included for the following 9 categories:

#### 1. Food security

Includes indicators such as:

Cornell-Radimer hunger scale

Food Consumption Score (FCS)

Food Insecurity Experience Scale (FIES)

Household Dietary Diversity Score (HDDS)

Household Food Insecurity Access Prevalence (HFIAP)

Household Food Insecurity Access Scale (HFIAS)

Household Food Security Survey (HHFS)

Household Hunger Scale (HHS)

Latin American and Caribbean Food Security Scale (ELCSA)

Months of Adequate Household Food Provisioning (MAHFP)

Famine, huger

Other food security measure (specify)

2. Food intake

Food intake of specific foods or food groups (eg: cereals, fruits, vegetables, meat). Specify which foods or food groups.

#### 3. Diet quality

Includes indicators such as:

Diet Quality Index (DQI)

Diet Quality Questionnaire (DQQ)

Diet Quality Score (DQS)

Diet Variety Score (DVS)

Dietary Diversity Score (DDS)

Global Diet Quality Score (GDQS)

Healthy Eating Index (HEI)

Individual Dietary Diversity Score (IDDS)

Minimum Dietary Diversity (MDD)

Minimum Dietary Diversity for Women (MDD-W)

Nutrient Rich Food/Diet Index (NRF or NRD)

Other diet quality measure (specify)

#### 4. Dietary patterns

Includes:

Adherence to dietary recommendations (including FBDG)

Atlantic

Carb (low or high)

EAT-Lancet diet

Flexitarian (other than EAT-Lancet)

Mediterranean

Nordic

Traditional

Processed, unprocessed, highly processed (NOVA classification)

Vegetarian

Vegan

Western

Dietary Approaches to Stop Hypertension (DASH)

Factor analysis (Explanatory Factor Analysis (EFA), Principal Components Analysis (PCA))

Other dietary pattern (specify)

#### 5. Nutrient intakes and nutrient biomarkers

Intake through food or supplements or biomarkers of specific micronutrients (vitamins, minerals, polyphenols, antioxidants), or specific macronutrients (carbohydrates, protein, fats, fiber).

Intake of specific micronutrients through food

Intake of specific micronutrients through supplements

Biomarkers for micronutrients

Intake of specific macronutrients through food

Biomarkers for macronutrients

Other nutrient intake or biomarker measures (specify)

#### 6. Infant and young child feeding

Includes:

Breastfeeding

Child diets

Complementary foods

Minimum Dietary Diversity (child)

Minimum Meal Frequency

Minimum Adequate Diets

Other IYCF

#### 7. Fetal and birth outcomes

Including:

Birth weight

Birth length

Head circumference

Small-for-gestational age (SGA)

Intra-uterine growth restriction (IUGR)

Other fetal and birth outcome (specify)

#### 8. Anthropometry

Includes:

BMI

Body composition

Body ratios (e.g.: waist to hip ratio (WHR))

Calf or thigh circumference

Mid-upper arm circumference (MUAC)

Waist or hip circumference

Relative height, stunting, HAZ

Relative weight, wasting, WHZ

Underweight, WAZ

Other anthropometry (specify)

#### 9. Diet-related non-communicable diseases

Includes:

Diabetes

Cardiovascular disease (CVD), including CHD, stroke

Hypertension

Cancer

Mycotoxin-related health outcomes

Other NCD (Specify)

### 7. Climate adaptation

Does the intervention described in this study contribute to climate change adaptation? Climate adaptation interventions refer to actions taken to adjust to the current and anticipated impacts of climate change. These interventions aim to reduce vulnerability and enhance resilience to climate-related hazards such as extreme weather events, sea-level rise, and changing precipitation patterns.

Be specific, and using bullets, answer the following questions:

1. How does the study describe the potential for the proposed or implemented intervention to contribute to climate adaptation or climate resilience?
2. Which type of climate shock, hazard or weather events is the intervention designed to protect against?
3. Which measurements of climate change, climate shocks or climate hazards included in the analysis?

### 8. Climate mitigation

Does the study include a measure of climate mitigation as an outcome, either by reducing greenhouse gas emissions or increasing carbon storage and sequestration?

Be specific about how the climate mitigation outcomes are measured, including:

- Measures of individual greenhouse gas emissions (e.g., carbon CO2, methane CH4, nitrous oxide N2O)
- Aggregate measures (Kilograms of carbon dioxide equivalents (Kg CO2e), Global Warming Potential (GWP))
- Measures of GHG intensity per productive unit (e.g., methane intensity in livestock production)

### 9. Climate focus

Is the main focus of the intervention on mitigating climate change (ie reducing the sources of GHGs or enhancing the sinks that absorb these gases), adaptation to the current or anticipated impacts of climate change (aim to reduce vulnerability and enhance resilience to climate-related hazards such as extreme weather events, sea-level rise, and changing precipitation patterns), or both mitigation and adaptation?

*Specified possible answers:*

1. Mitigation
2. Adaptation
3. Both mitigation and adaptation
4. Neither adaptation nor mitigation

### 10. Gender Implications

How do these interventions contribute to or pose potential trade-offs for gender equality and women’s empowerment? In particular, does the intervention contribute to women’s decision making, ownership, control of resources, self-esteem, time use, incidence of sexual or gender-based violence, or other gender empowerment outcomes?

## 5.2: Coding categories

The following section describes the instructions and categories used by the authors to code studies after they were included at full-text screening. Codes were utilized to categorize studies based on their interventions, methods, outcomes, indicators, climate focus, level of gender analysis, and economic and regional settings.

### Interventions

Select the appropriate intervention ***domain*** and ***sub-domain***for the main intervention being assessed in each study, based on the descriptions included in the table. Intervention categories adapted from Murphy et al., 2025,7 Moore et al. 2020,8 FAO 2023,5 and the 3ie taxonomy of intervention sectors9,10.

| **Domain** | **Sub-domain** | **Intervention** | **Description** |
| --- | --- | --- | --- |
| **Food production systems** | Improved crop varieties | R&D, delivery and production of improved crop varieties | “Research & Development (R&D) for improved crop varieties covers the identification and development of seeds with a wide variety of traits and characteristics, including breeding for higher yields, climate resilience, chemical and pest resistance, as well as adapting existing seeds to niche agro-ecological zones or shifting environmental contexts"11. “Interventions to distribute improved seeds aim to address a variety of barriers to improved seed adoption faced by farmers”11. |
| Biofortified crop adoption | “Biofortification uses different breeding techniques to increase the nutritional density of crops”11. |
| Livestock management and services | Livestock management practices | This includes “. . . training on animal husbandry, establishing grazing rights and changes to livestock rearing, housing, and feeding”11. |
| Veterinary services | Vaccines and other veterinary health services for livestock11. |
| Aquaculture and fisheries | Integrated aquaculture systems | Integration between agriculture and aquaculture, more specifically defined as “. . . the concurrent or sequential linkage between two or more activities, of which at least one is aquaculture”12. |
| Improved fisheries | Reforming and improving the management of, and eliminating inappropriate subsidies related to, wild-capture fisheries to reduce excess effort, and overfishing13. |
| Climate-sensitive agricultural practices | Climate-smart agriculture | “Climate-smart agriculture (CSA) is an approach that enables and encourages actors within farming systems to adapt to climate change”11. |
| Conservation agriculture | “The three key elements of conservation agriculture are minimizing soil disturbance, protecting soil with vegetation, and varying crops from year to year”13. |
| Agroforestry | “Agroforestry is founded on long-standing practices of integrating trees with crop and animal farming systems, encompassing a great diversity of land management systems practiced globally”14. |
| Agroecology | “Agroecology is a holistic approach that incorporates ecological, health, social, and economic considerations into agricultural and food systems design and implementation”15. A non-exhaustive list of the agroecological principles includes co-creation of knowledge, economic diversification, soil and animal health, input reduction, biodiversity, recycling, fairness and connectivity16. |
| Regenerative Agriculture | Includes the regenerative practices: compost application, cover crops, crop rotation, green manures, no-till or reduced tillage, and/or organic production13. |
| Other climate-smart practices | Including Integrated pest management and sustainable land management (SLM), soilless techniques (aeroponics, hydroponics, and aquaponics), sustainable intensification practices (SIP), soil and water conservation (SWC) practices, sustainable agriculture practices (SAP), crop diversification, shifting cultivation (Jhum system), agro-silvo pastoralism, ecosystem-based management practices (EBM), and organic production. |
| Home gardens & urban agriculture | Home gardens | “Programs promoting home gardens or Homestead Food Production (HFP) aim to increase dietary diversity and reduce malnutrition by increasing the amount of vegetables produced and consumed at the household level”11. |
| Urban agriculture | Commercial, community, and household agriculture. Includes urban vertical farms17. |
| Inputs & infrastructure | Irrigation | Both large and small-scale infrastructure and water management schemes11. |
| Fertilizer and inputs access and adoption | “... targeted interventions to optimize fertilizer and input access and adoption”11. |
| On-farm mechanization | “... including equipment rental, distributing farm implements, and mechanization as a service”11. |
| Extension & training | Agricultural extension | Including traditional and digital extension and farmer field schools (FFS)11. |
| Training and information diffusion | Training of farmers on improved agricultural practices, “... including proper use of seeds and fertilizer, use of complementary techniques like demi-lunes for rainwater harvesting, and strategies for managing harvests to maintain quality and minimize postharvest losses”11. |
| Business training | “... training for Micro, Small & Medium Enterprises (MSMEs) business owners, including training in bookkeeping, pricing, marketing, sales, goal-setting, and more” 11. |
| Weather services | Weather forecasting & climate information | Including both short- and long-term forecasts. “Short-term forecasts alert farmers to prepare for sudden shocks or provide up-to-date rainfall and heat information. Long-term forecasts facilitate better planning for crop selection in seasonal strategies”11. |
| Early warning systems | Systems that allow for the translation of early warning signs into actions that lessen the impacts of natural disasters. |
| Financial services for farmers | Agricultural credit | “Several types of interventions aim to expand credit access among smallholder farmers, such as asset collateralized loans, credit for agricultural inputs, post-harvest loans, and emergency loans”11. |
| Insurance designed for farmers | Including index insurance, livestock mortality insurance, and climate risk insurance11. |
| Savings groups | “Collective action groups, such as savings or self-help groups (SHGs), are voluntary groups that meet regularly to facilitate savings and access to group-liability credit. Some of these groups, such as Village Savings and Loans Associations (VSLAs), combine savings, credit, and insurance products. Others, like Rotating Savings and Credit Associations (ROSCAs), encourage individuals to make cyclical contributions disbursed as a lump sum to one member in each cycle”11. |
| Governance | Payments for ecosystems services | “Payments for Ecosystems Services (PES) describes any program that provides incentives for farmers or landholders for activities that support sustainable ecosystems - including forest cover, indigenous plants and animals, or waterways”11. |
| Land tenure governance | “Land tenure and land governance are the systems and procedures for establishing the rights of people in relation to land and other natural resources, including both formal and informal institutions”11. |
| Land fragmentation/consolidation | Land consolidation is a public, legally regulated process that reorganizes rural land ownership and use by reallocating parcels among landowners and users18. Land fragmentation is the division of a farm’s land into multiple, often non-adjacent plots, which can reduce resource use efficiency and affect agricultural productivity.19 |
| Supply chains | Agriculture supply chains | “Interventions aimed at improving agricultural supply chains intend[ing] to improve access to input or output markets”11. |
| Aggregation and output market access models | “Aggregation and output market access models include contract farming arrangements, farmer associations, and digital trading platforms to link buyers and farmers directly”11. |
| Other food production |  | Interventions including alternative food supply pathways (aquatic-based, current food supply structure, livestock-based, and plant-based substitution pathways). |
| Multicomponent food production |  |  |
| **Storage and Distribution** | Storage and distribution | Support for creating storage structures at farms | “Efforts that provide technical, logistical, and financial support to improve farm storage practices such as the use of sheds with off-the-ground storage”8. |
| Implementation of distribution centers | “Farmers cooperatives and other organizations that gather crops/animals from multiple farms to a central location before selling / distributing the goods”8. |
| Food loss and waste management | Improved food storage | Primarily triple-layered hermetic storage bags11. |
| Cold chain initiatives | “Interventions which support the use of refrigeration to keep food from spoiling between harvest and consumption”8. |
| Composting | “Programs that provide education and resources for composting”8. |
| Food donation or food waste reuse | “Programs that allow for the donation of foods which will not be consumed before they spoil” 8. |
| Use of and education regarding the use of spoiled, near spoiled, or traditionally uneaten food | “Programs that support the use of spoiled, near spoiled, or traditionally uneaten foods / agricultural by-products. Includes interventions to re-purpose foods / agricultural by-products for non-food use. Agricultural by-products may be re-purposed outside of the food system, but, because the by-product was produced within the food system, this will be included”8. |
| Education regarding improved storage techniques | Educational programs to improve knowledge of and support storage solutions. |
| Other storage and distribution |  |  |
| Multicomponent storage and distribution |  |  |
| **Food processing** | Food fortification | At the mill | “Any intervention / regulation in which micronutrients are added to foods”8. |
| Local/ household |
| National regulations on fortification |
| Packaging |  | “Packaging food, largely for preservation purposes” 8. |
| On-farm post-harvest processing | Drying or other post-harvest processing | “Any processing of harvested goods that occurs before the food leaves the farm. This is often drying, but can include threshing, winnowing, pounding / milling, and more”8. |
| Other food processing |  |  |
| Multicomponent food processing |  |  |
| **Food environments** | Food composition and labelling | Reformulation | Product reformulation to improve nutritional content. |
| Food labeling | Including front of package labeling and menu labeling. |
| Food promotion | Food promotion | Including changes in advertising regulations and innovative store designs8. Includes food promotion based on food-based dietary guidelines (FBDG). |
| Food prices, trade regulation | Food and carbon taxes | Taxes on unhealthy or high-emissions foods, or carbon-taxes applied to foods. |
| Subsidies | Subsidies that lower prices of certain foods. |
| Import/export quotas or bans | “Regulations that stipulate how much of specific goods can enter or leave a country. Largely restricted to international trade arrangements”8. |
| Tax breaks to retailers | Tax incentives for retailers. May specifically incentivize certain foods in certain areas8. |
| Price controls | “State controls on food prices” 8. |
| Other food environment |  | Including default options such as vegetarian options for menus/events or reducing plate size. |
| Multicomponent food environment |  |  |
| **Sustainable diets** | Atlantic | Sustainable diet interventions focus on promoting dietary patterns that are healthy and have a low environmental impact. Sustainable diet sub-domains intend to capture self-described classifications of studied diets. | Traditional eating pattern from Spain and Portugal. |
| DASH | DASH stands for Dietary Approaches to Stop Hypertension, and it focused on reducing blood pressure and promoting heart health. |
| EAT-Lancet | Also known as the ‘Planetary health diet’, it was developed by the EAT-*Lancet* commission20, as a largely plant-based diet with small amounts of animal foods. |
| Factor analysis (PCA, EFA) | Principal Component Analysis (PCA) and Exploratory Factor Analysis (EFA) are used to identify underlying patterns in dietary data. |
| Flexitarian | Flexitarian diets, other than the EAT-*Lancet* diet, that include moderate amounts of animal-source foods. |
| Food-based dietary guidelines (FBDG) or national dietary guidelines | Diets developed based on national recommendations, including FBDG or national guidelines. |
| Healthy | Diets described as healthy, without an explicit description of their environmental sustainability goals or benefits. |
| Local | Diets that seek to include foods produced locally (i.e.: within a pre-determined radius). |
| Low-impact foods | Diets that focus on including foods that are understood to have low environmental impacts (e.g.: bivalves, insects) as a replacement for high-impact foods such as beef. |
| Mediterranean | Diets based on the traditional patterns consumed in countries bordering the Mediterranean Sea. |
| No or low dairy | Diets that limit or eliminate the consumption of milk, cheese, and other dairy products. |
| Novel foods and alternative proteins | Including diets that emphasize traditional or indigenous crops (Neglected or underutilized species (NUS); also described as orphan, forgotten, lost, alternative, minor, local, traditional, or opportunity (plant) crops),  Alternative proteins (Meat made from plants or produced via fermentation), and Novel proteins (Protein from less commonly consumed animals, including insects, or protein that is cultivated from animal cells.) |
| Nordic | Diets based on the traditional eating patterns of Nordic countries. |
| Optimized | Diets created through optimization models that prioritize outcomes such as nutrient content, price, or current consumption patterns. |
| Pescatarian | Diets that limit animal-source food consumption to fish and other aquatic foods. |
| Processed, ultra-processed | Diets categorized based on the level of processing of foods consumed. |
| Traditional | Traditional diets of individual countries, regions or peoples (other than Atlantic, Nordic, or Mediterranean). |
| Vegetarian | Diets that limit animal-source food consumption to diary and eggs. Also known as lacto-ovo vegetarian. |
| Vegan | Diets that exclude all animal-source foods. |
| Western | Dietary patterns commonly consumed in Western societies, characterized by high intakes of processed foods, saturated and trans fats, refined grains and sugary foods and low intake of fruits, vegetables and whole grains. |
| Weight loss, energy-, carb-, fat-restricted | Diets develop to promote weight loss, or diets that restrict one of the three macronutrients. |
| WHO Guidelines | Diets developed following WHO guidelines and recommendations for healthy eating. |
| Other sustainable diet | Other diets not otherwise captured in other sub-domains. |
| Multicomponent sustainable diet |  |
| **Consumer behavior** | Information and Behavior Change Communication (BCC) | Nutrition campaigns | “Nutrition education campaigns aim to improve the health status of households, particularly children and women, by increasing knowledge about foods that improve nutrition and overall health”11. |
| Cooking classes | Used to “... teach households how to prepare foods to improve the nutritional content of meals” 11. |
| Professional services to promote healthy eating (dietitians/nurses) | These are “... programs using dieticians and nurses to promote healthy eating. The interventions aim to address the information gap among adults and caregivers regarding daily dietary needs and micronutrient deficiencies in children”11. |
| Other consumer behavior |  |  |
| Multicomponent consumer behavior |  |  |
| **Social protection and Livelihoods** | Adaptive social protection |  | “... Cash transfers to farmers and rural households in settings affected by weather shocks or seasonal disruptions to consumption. Social protection programs can also be offered in anticipation of climate events, often supplemented with disaster preparedness efforts”11. |
| Cash and in-kind transfers |  | “Cash and in-kind transfers are social protection interventions that provide cash or assets directly to households. Transfers may be unconditional or conditional ...” 11. |
| Graduation programs |  | “Graduation or cash-plus programs are multifaceted interventions to improve access to self-employment activities. At the core of the model is a productive asset, typically livestock or cash transfers combined with different types of training. In some settings, these programs also offer access to healthcare, saving accounts, life skills coaching, cash or food support, and health or nutrition training"11. |
| Livelihood diversification |  | Engaging in a range of income-generating activities. |
| Other institutional food provision & procurement |  | Efforts to purchase and/or provide food through non-school institutions such as workplaces, prisons, or other public or private institutions. |
| School feeding |  | School feeding programs “… enhance the educational outcomes of children by ensuring that children receive nutritional meals during school time, thereby improving their performance.”11. |
| Technical and vocational education and training |  | “Technical and Vocational Education and Training (TVET) interventions encompass a wide variety of programs, including some elements of vocational education, apprenticeship, and hard and soft skills training, among other components”11. |
| Public work programs |  | Governments provide guaranteed employment to job seekers as a means to supplement income and enhance public infrastructure11. |
| Seasonal migration |  | “Models to facilitate seasonal migration aim to help households mitigate periods of hunger during the agricultural cycle (lean seasons) by encouraging temporary migration to areas with more job opportunities”11. |
| Other social protection and livelihoods |  |  |
| Multicomponent social protection and livelihoods |  |  |
| **Water, Sanitation & Hygiene** | Hygiene |  | Including domestic hygiene, environmental hygiene, face washing promotion, food hygiene, hand hygiene interventions, menstrual hygiene management (MHM) and vector control10. |
| Sanitation |  | Interventions include improved drainage, latrine and toilet provision, onsite waste management, sanitation marketing and promotion, and improved sewerage10. |
| Water supply |  | Interventions that improve the supply of water in schools, households, and the community10. |
| Water treatment and storage |  | Providing supplies for, or education on water treatments that can be done either at the source or at the point-of-use. Increasing the proper storage of water after it has been treated and providing water testing results to communities10. |
| Other WASH |  |  |
| Multicomponent WASH |  |  |
| **Nutrition and health services** | Improved infant and young child feeding (IYCF) practices |  | “... interventions that are based on WHO guidelines to improve feeding practices of children under two years of age. Many IYCF interventions are centered on the adoption of exclusive breastfeeding practices, while others include nutrition education programs and the provision of calorie-dense complementary foods”11. |
| Micronutrient supplementation in emergencies |  | Targeted, lifesaving supplementation that delivers micronutrients during crises. |
| Nutrient supplementation |  | Includes multiple micronutrient supplementation (MMS) for targeted groups and mass supplementation. |
| Nutrition campaigns |  | Nutrition campaigns “... address the lack of knowledge among adults and caregivers regarding daily dietary needs and micronutrient deficiencies in women of childbearing age and children”11. They may include community meetings, healthy food social marketing campaigns and door-to-door campaigns. |
| Other nutrition and health services |  |  |
| Multicomponent nutrition and health services |  |  |
| **Energy** | Biofuels |  | Including second and third generation biofuels. |
| Other energy |  | For example, renewable energy or reducing electricity consumption. |
| Multicomponent energy |  |  |
| **Other sectors** | Other sectors |  | For example, transport (increased active transport such as biking and walking). |

### Multi-sector Interventions

If the intervention is coded with domains in more than one sector, indicate it with a “Y” under the “***Multi-sector?***” column.

### Methods

Select the appropriate method and if quantitative/mixed methods select the appropriate study design for the quantitative portion of the study. Systematic reviews and meta-analyses should be classified as mixed methods:

| **Method** | **Study Design** |
| --- | --- |
| Quantitative | Quasi-experimental |
| Modelling |
| Experimental |
| Cross-sectional |
| Cohort |
| Case study |
| Mixed methods | Systematic reviews and meta-analyses |
| Qualitative |  |

### Quasi-experimental methods

If the study design is quasi-experimental, describe which ***quasi-experimental analysis method*** was used:

| **Quasi-Experimental Analysis Method** | **Characteristics of Analysis Method** |
| --- | --- |
| Regression discontinuity | Regression discontinuity designs (RDD) or fuzzy-RDD |
| Instrumental variable estimation | Instrumental variables (IV) |
| Endogenous treatment-effects models, endogenous switching regression, and other methods synonymous to the Heckman two step model. |
| Difference-in-difference/Fixed effects | Difference-in-differences (DID), two-way fixed-effects (TWFE), and two-way Mundlak regressions (TWM). |
| DiD models will include an interaction term between a time and intervention variable in a regression model. They may also regress an intervention variable on an outcome variable measuring the changes in outcomes over time or present a t-test comparing changes in outcomes over time between the intervention and control group. |
| TWFE regressions must include time fixed-effects and unit fixed-effects at the level of the intervention (or lower). For example, if the intervention varies at a village level, it must include either village fixed-effects or fixed-effects of a smaller unit, such as households. |
| TWM models include correlated random-effects and pooled OLS regression models that control for unit-specific time averages and time-period specific cross-sectional averages. |
| Interrupted time series | Interrupted time series (ITS) models, with or without a contemporaneous comparison group. The ITS regression model must adjust for autocorrelation, or it can use autoregressive integrated moving-average (ARIMA) models. An ITS model should include pre-intervention outcome data for a minimum of three time periods. |
| Statistical matching | Weighting and matching approaches which control for observable confounding, including non-parametric approaches (e.g., statistical matching, covariate matching, coarsened-exact matching, propensity score matching) and parametric approaches (e.g., propensity-weighted multiple regression analysis). |
| Synthetic controls | The synthetic control method. |

### Nutrition Outcomes and Indicators

Select up to three ***nutrition outcome categories*** and ***indicators,*** adapted from Sparling et al. 2022:2

| **Nutrition Outcome Category** | **Indicators** |
| --- | --- |
| Food security (FS) | FS: Cornell-Radimer hunger scale |
| FS: Coping Strategies Index (CSI) |
| FS: Food Consumption Score (FCS) |
| FS: Food Insecurity Experience Scale (FIES) |
| FS: Household Dietary Diversity Score (HDDS) |
| FS: Household Food Insecurity Access Prevalence (HFIAP) |
| FS: Household Food Insecurity Access Scale (HFIAS) |
| FS: Household Food Security Survey (HHFS) |
| FS: Household Hunger Scale (HHS) |
| FS: Latin American and Caribbean Food Security Scale (ELCSA) |
| FS: Months of Adequate Household Food Provisioning (MAHFP) |
| FS: Famine, hunger, undernourishment |
| FS: Other food security measure |
| FS: Qualitative food security |
| Food intake (FI) | FI: Intake of specific foods or food groups |
| FI: Qualitative food intake |
| Diet quality (DQ) | DQ: Diet Quality Index (DQI) |
| DQ: Diet Quality Questionnaire (DQQ) |
| DQ: Diet Quality Score (DQS) |
| DQ: Diet Variety Score (DVS) |
| DQ: Dietary Diversity Score (DDS) |
| DQ: Global Diet Quality Score (GDQS) |
| DQ: Healthy Eating Index (HEI or AHEI) |
| DQ: Individual Dietary Diversity Score (IDDS) |
| DQ: Minimum Dietary Diversity (MDD) |
| DQ: Minimum Dietary Diversity for Women (MDD-W) |
| DQ: Nutrient Rich Food/Diet Index (NRF or NRD) |
| DQ: Other diet quality measure |
| DQ: Qualitative diet quality |
| Nutrient intakes (NI) | NI: Intake of macronutrients through food |
| NI: Intake of micronutrients through food |
| NI: Intake of micronutrients through supplements |
| NI: Multiple nutrient adequacy of intake (micro and macro) |
| NI: Other nutrient intake measures |
| NI: Qualitative nutrient intake |
| Biomarkers (BM) | BM: Biomarkers for micronutrients |
| BM: Biomarkers for macronutrients |
| BM: Other biomarkers |
| BM: Qualitative biomarkers |
| Infant and young child feeding (IYCF) | IYCF: Breastfeeding |
| IYCF: Child diets |
| IYCF: Complementary foods |
| IYCF: Minimum Dietary Diversity (child) |
| IYCF: Minimum Meal Frequency |
| IYCF: Minimum Adequate Diets |
| IYCF: Other IYCF |
| IYCF: Qualitative IYCF |
| Fetal and birth outcomes (BO) | BO: Birth weight |
| BO: Birth length |
| BO: Head circumference |
| BO: Small-for-gestational age (SGA) |
| BO: Intra-uterine growth restriction (IUGR) |
| BO: Other fetal and birth outcome |
| BO: Qualitative fetal and birth outcomes |
| Anthropometry (AP) | AP: BMI |
| AP: Body composition |
| AP: Body ratios (e.g.: waist to hip ratio (WHR)) |
| AP: Calf or thigh circumference |
| AP: Mid-upper arm circumference (MUAC) |
| AP: Waist or hip circumference |
| AP: Relative height, stunting, HAZ |
| AP: Relative weight, wasting, WHZ |
| AP: Underweight, WAZ |
| AP: Other anthropometry |
| AP: Qualitative anthropometry |
| Diet-related non-communicable diseases (NCD) | NCD: Diabetes |
| NCD: Cardiovascular disease (CVD), including CHD, stroke |
| NCD: Hypertension |
| NCD: Cancer |
| NCD: Mycotoxin-related health outcomes |
| NCD: Other NCD |
| NCD: Qualitative NCD |
| No nutrition outcomes |  |

### Climate Focus

Select the most appropriate ***climate focus*** category:

| **Climate Focus** |
| --- |
| Adaptation |
| Mitigation |
| Both adaptation and mitigation |
| Neither |

### Mitigation indicators

If the climate focus is “mitigation” or “both adaptation and mitigation”, and the study measures the mitigation potential of the intervention, select the appropriate ***mitigation indicator***:

| **Mitigation indicator** | **Description** |
| --- | --- |
| CO2 | Carbon dioxide emissions |
| CO2e | Carbon dioxide-equivalents |
| GWP | Global Warming Potential |
| CH4 | Methane emissions, not converted into CO2e |
| % GHGe reduction | Percent reduction in greenhouse gas emissions, relative to a baseline or control |
| CO2 & CH4 | Both carbon dioxide and methane emissions ate reported |
| CO2, CH4 & N2O | Carbon dioxide, methane, and nitrous oxide emissions are reported |
| CO2e & CH4 | Reporting both total emissions in CO2e and methane separately |
| Other | Including reviews with combinations of the indicators listed above |

### Level of Gender Analysis

Select the most appropriate ***level of gender analysis*** included in the study:

| **Level of Gender Analysis** | **Description** |
| --- | --- |
| Not discussed | Lowest level of analysis. Gender is not discussed at all. |
| Sex disaggregated analysis/results | Sex-based differences may be captured in the analysis and/or discussion of the study results, for example, through consideration of sex-based differences in nutrient requirements, disaggregated analysis of intervention impacts, or controlling for the gender of intervention recipient. However, there is no discussion as to what the implications for gender equality or women's empowerment are. |
| Minimally discussed | Includes some discussion of the implications of the intervention(s) on women's empowerment and/or gender equality. |
| Meaningfully discussed | Includes substantial discussion of the implication of the intervention(s) on women's empowerment and/or gender equality. |
| Analyzed | Highest level of analysis. The intervention(s)’ impacts on women’s empowerment are analyzed through dedicated indicators related to, for example, women’s financial inclusion, decision making power, leadership, and gender-based violence. |

### Economic and Regional Setting

Use World Bank names for ***country*** specific papers. Studies that did not specify country or that had more than three countries should be coded as NA.

Record the specific ***region***, based on the study setting according to World Bank regions. Studies from multiple countries from more than one region should be coded as Global studies:

| **Regions** |
| --- |
| East Asia and Pacific |
| Europe and Central Asia |
| Latin America & Caribbean |
| Middle East and North Africa |
| North America |
| South Asia |
| Sub-Saharan Africa |
| Global studies |

Record the specific ***country classification by income***, based on the study setting according to World Bank income groups for the year of study publication. Studies from multiple countries from different income groups should be coded as NA.

| **Country classification by income** |
| --- |
| Low-income |
| Lower-middle income |
| Upper-middle income |
| High income |
| NA |

# Supplementary Methods 6: Data extraction form and guide

| **1** | **Section /  Sub-section** | **Field** | | **Instructions** | **Field Specifications** | | |
| --- | --- | --- | --- | --- | --- | --- | --- |
| **2** | **Required /Optional** | **Response Limit** | **Response Format** |
| **3** | **Study Identification and Form Details** | Form start time (HH:MM) | | Record the local time when you begin data extraction for this study using HH:MM. The cell is already formatted to accept time in the 24-hour format. | Required | One answer | Numeric |
| **4** | Study EPPI ID | | Copy this and the next three cells from the 'Studies to review list' (EPPI ID to Study title). Verify the EPPI ID assigned to this study. This ID will have been provided to you during the allocation or assignment process . | Required | One answer | Numeric |
| **5** | First Author | | Verify the last name (surname) of the first author listed in the study’s citation, usually found at the top of the first page or in the abstract. | Required | One answer | Text |
| **6** | Year | | Verify the year the study was published. You can find the publication year in the citation or on the title page of the study. If the study is not cited, refer to the publication details, such as the journal’s website or publisher’s information. | Required | One answer | Numeric |
| **7** | Study title | | Verify the full title of the study exactly as it appears in the publication. | Required | One answer | Text |
| **8** | Reviewer Initials | | Enter the initials of your first and last names. Use only uppercase letters for your initials and maintain consistency in the format each time. | Required | One answer | Text |
| **9** | Date form completed | | Enter the date you completed the data extraction form. Please use the format DD/MM/YYYY. | Required | One answer | Numeric |
| **10** | **Study Characteristics** | Study type  (peer reviewed or grey literature) | | Indicate whether the study was published in a peer-reviewed journal or classified as grey literature. Please select one option from the dropdown list. The available choices for this field are listed in the next cell/column. | Required | One answer | Select from dropdown |
| **11** | Grey Literature Source | | If the study is grey literature, specify the type or source.   If the study is published in a peer-reviewed journal, write "NA". | Required | One answer | Text |
| **12** | Funding source | | Record the name or description of the organization/s that funded the study, if stated in the publication. If funding for the study and intervention are provided by different sources, distinguish between them. If there are specific funding numbers or grant IDs mentioned, include them as well.   If no funding details are provided, write "Not reported". | Required | One answer | Text |
| **13** | Ethical approval obtained | | Note whether the study reports receiving ethical approval. Select "Yes" if ethical approval is explicitly stated. Select "No" if the study either did not obtain approval or does not mention it at all.   This information is often found in the Methods section or Acknowledgments. If ethical approval was granted, the study may include a statement such as, *"The trial was approved by the Medical Sciences Interdivisional Research Ethics Committee of the University of Oxford (ref: R54329/RE001) and registered prospectively"*. | Required | One answer | Select from dropdown |
| **14** | Aim of study as stated by authors | | Copy or summarize the main aim or objective of the study as described by the authors.   If you’re copying the exact wording from the article, be sure to use quotation marks so we know it’s a direct quote. If you're summarizing in your own words, quotation marks are not needed, but aim to keep the meaning true to the original. In either case, include the page number. This helps with validation and reference. | Required | One answer | Text |
| **15** | Study design | | Select the primary study design using the dropdown list provided. Please select only one option. The available choices for this field are listed in the next cell or column.   You can usually find details about the study design in the Methods section of the paper. Most of the time, the authors will directly state the study design, but in some cases, you may need to infer it based on how the study was carried out. For more guidance on identifying study designs, see the **Methods** tab. | Required | One answer | Select from dropdown |
| **16** | Quasi-experimental methods | | If you selected quasi-experimental in the previous field, specify the type of quasi-experimental method used by choosing one from the dropdown list. The available options for this field are listed in the next cell or column. For more guidance on identifying study designs, see the **Methods** tab.  If quasi-experimental was not selected, choose "Not Applicable". | Required | One answer | Select from dropdown |
| **17** | Mixed method? (select yes if study contain qual and quant analysis) | | Select "Yes" if the study integrates both qualitative and quantitative method or analysis. This means the study combines both types of data, such as qualitative insights from interviews or focus groups alongside quantitative data from surveys or experiments. Otherwise, select "No". | Required | One answer | Select from dropdown |
| **18** | Additional Methods 1 | | Record any secondary methods used in the study. Use this field and the next one to capture any extra methods that were applied. Choose the appropriate option from the dropdown list. The available choices for this field are listed in the next cell or column. | Required | One answer | Select from dropdown |
| **19** | Additional Methods 2 | | Continue listing any additional methods that haven’t already been captured. You can also specify here any other analytical techniques or modeling approaches used in the study. If none, leave blank. | Optional | One answer | Text |
| **20** | Study Design Details (e.g.: cluster-RCT) | | Provide more specific information about the design, including any variations or special features. If there are any unique approaches used, be sure to mention them here. | Optional | One answer | Text |
| **21** | Cost Evidence included? | | Indicate whether the study provides information on costs or cost-effectiveness. This could include details on the cost of interventions, comparison of costs to outcomes, or any financial data related to the study. Select "Yes" if the study includes this information. Otherwise, select "No". | Required | One answer | Select from dropdown |
| **22** | Cost Evidence Description | | If cost evidence is reported in the study, capture it here. Directly copy the information with quotation marks and be sure to include the page number where the information can be found. The format should be: [specify what type of cost data is available]: [extracted information].  Write "NA" if no cost evidence is included. | Optional | One answer | Text |
| **23** | Participant Recruitment Method | | Describe how participants were recruited into the study. This could include where and how they were identified, which settings or platforms were used, and any steps taken to invite or select them. For quasi-experimental studies where participant recruitment for the intervention is not clearly stated, you may instead include or describe the sampling approach or selection process the authors used to identify participants for their study.  If no details are provided, write "Not reported". | Required | One answer | Text |
| **24** | Participant Inclusion Criteria | | Describe the criteria the study used to include participants. This typically refers to the characteristics or conditions individuals had to meet to be eligible for the study. This information is usually found in the Methods section. Quote directly if needed, add page numbers.  If no details are provided, write "Not reported". | Required | One answer | Text |
| **25** | Participant Exclusion Criteria | | Describe any criteria the study used to exclude participants. This typically refers to the characteristics or conditions that would disqualify individuals from being part of the study.  If no details are provided, write "Not reported". | Required | One answer | Text |
| **26** | Study Duration | | Record the total duration of the study, from start to completion. This is sometimes explicitly stated by the authors. If the study mentions the duration of the intervention separately, make sure to distinguish it from the overall study duration. For example, the entire study might have run for 12 months, but the actual intervention lasted only 6 months. If both durations are provided, be sure to specify each one clearly to avoid confusion.  If no details are provided, write "Not reported". | Required | One answer | Text |
| **27** | Follow-up Duration | | Record the length of time participants were followed after the intervention or initial assessment. If the study includes multiple follow-up periods, be sure to list each one separately, using one cell for the first and the cell below for the next, along with any relevant details, to provide a full picture of the follow-up process.  If no details are provided, write "Not Reported". | Required | Multiple answers allowed | Text |
| **28** | Level of Gender Analysis | | Indicate whether and how gender was considered in the design or evaluation of the intervention. The available choices for this field are shown in the next cell or column. The level of gender consideration can range from no discussion to a detailed analysis of women’s empowerment and gender equality. See the explanation below:  1. ***Not discussed*** (Lowest level): Gender equality or women’s empowerment was not considered or mentioned at all.  2. ***Sex disaggregated analysis/results***: Sex-based differences may be captured in the analysis and/or discussion of the study results. For example, consideration of sex-based differences in nutrient requirements, disaggregated analysis of intervention impacts, or controlling for the gender of the intervention recipient. However, there is no discussion of the implications for gender equality or women’s empowerment.  3. ***Minimally discussed***: The study includes some discussion of the implications of the intervention on women’s empowerment and/or gender equality, but the discussion is not in-depth.  4. ***Meaningfully discussed***: There is a substantial discussion of the implication of the interventions on women's empowerment and/or gender equality.  5. ***Analyzed*** (Highest level): The intervention’s impacts on women’s empowerment are analyzed through dedicated indicators related to, for example, women’s financial inclusion, decision-making power, leadership, or gender-based violence. | Required | One answer | Select from dropdown |
| **29** | Implications for gender empowerment (copy from paper) | | Copy text from the study that discusses impacts on gender equality or women’s empowerment, including both positive impacts (e.g.: women in leadership roles) as well as any trade-offs that may be discussed (e.g.: increased time burden for women). Use quotation marks for direct quotes and include the page number. If you selected "Minimally discussed", "Meaningfully discussed", or "Analyzed" in the previous question, make sure to provide a corresponding answer in this column.  If answered "Not discussed" in the previous question, write "NA". | Optional | One answer | Text |
| **30** | **Intervention Characteristics** | Intervention description | | Copy the authors' description of the intervention directly from the study. Use quotation marks for direct quotes and include the page number. | Required | One answer | Text |
| **31** | Main intervention domain | | Select the most appropriate broad thematic area or category that best describes the main focus of the intervention. Use the dropdown list provided. The available choices for this field are shown in the next cell or column. | Required | Multiple answers allowed | Select from dropdown |
| **32** | Intervention sub-domain | | Specify the more detailed focus within the main intervention domain you selected. For example, if you chose Food Production Systems (FP) as the main domain, make sure to select a sub-domain that begins with "FP" to keep the categorization consistent. The available choices for this field are shown in the next cell or column. | Required | Multiple answers allowed | Select from dropdown |
| **33** | Multi-component intervention? (yes or no) | | Indicate whether the intervention includes more than one distinct component. Select "Yes" if the intervention combines two or more elements. Select "No" if the intervention focuses on a single component only. | Required | One answer | Select from dropdown |
| **34** | Multi-component sub-domain 1 | | If the intervention is multi-component, use this field to enter the first sub-domain that applies. Select the most relevant option from the dropdown list provided.  If the intervention is not multi-component, leave blank. Apply the same approach to the next two columns as well. | Optional | Multiple answers allowed | Select from dropdown |
| **35** | Multi-component sub-domain 2 | | Add a second sub-domain if applicable. Otherwise, leave blank. | Optional | Multiple answers allowed | Select from dropdown |
| **36** | Multi-component sub-domain 3 | | Add a third sub-domain if applicable. Otherwise, leave blank. | Optional | Multiple answers allowed | Select from dropdown |
| **37** | Additional intervention details | | Provide any other relevant information about the intervention that hasn't been captured above. This may include details about how the intervention was delivered, participant involvement, duration, setting, logistics of delivery, etc. | Required | One answer | Text |
| **38** | Unit of intervention allocation (e.g. individual, group) | | Specify the level at which the intervention was applied. For example, at individual, household, school, community level, etc. If the intervention was applied at more than one level, list each level in a separate cell. | Required | Multiple answers allowed | Text |
| **39** | **Setting** | Country(ies) | | List all countries where the study was conducted. If the study involves multiple countries, list each one separately in individual cells, using official country names. | Required | Multiple answers allowed | Text |
| **40** | Region (based on World Bank regions) | | Select the appropriate World Bank region for the country or countries involved, using the World Bank classifications. | Post-DEX | Multiple answers allowed | Select from dropdown |
| **41** | Economies | | Leave blank  Post DEX - we will record the World Bank income classification of the country at the time of the study (at the start of the intervention). | Post-DEX | Multiple answers allowed | Select from dropdown |
| **42** | Urbanization classification | | Indicate whether the study setting is rural, urban, peri-urban, urban slum, or a combination. Select as many as apply, with each option placed in a separate cell. Use the study's description to guide your classification.   In some papers, the setting is clearly stated, but if it's not clear, choose the "Not applicable/Not clear" option. | Required | Multiple answers allowed | Select from dropdown |
| **43** | Agroecological Zones (Based on FAO agroecological zone classification) | | Select the agroecological zone/s where the study was conducted using FAO categories. In some cases, this information is clearly stated in the study. Use the study description to guide your classification. Select as many as apply, with each option placed in a separate cell.   If the agroecological zone is not clear, choose "Not specified". | Required | Multiple answers allowed | Select from dropdown |
| **44** | **Participant Characteristics** | Total number of participants (N) | | Record the total number of participants included in the study, including those in any comparison groups. This total should reflect all participants involved in the intervention, control, or other comparison groups. If the study includes multiple phases/groups, make sure to account for all of them. Be sure to include the unit of measurement, such as individuals, households, etc. You can usually find this information in the Results section or in tables that list the number of participants (often labeled as "n").   If the exact number isn’t reported, write "Not reported". | Required | One answer | Text |
| **45** | Age | | Provide any reported age data for the participants, such as the age range, mean age, median age, or specific age categories. Be sure to include the units.   If no age data is reported, write "Not reported". | Required | One answer | Text |
| **46** | Sex | | Report the sex distribution of participants as provided in the study. This could include the number or percentage of male, female, or other gender categories represented in the study.   If no sex data is reported, write "Not reported". | Required | One answer | Text |
| **47** | Race, ethnicity, culture, language, religion, if specified | | Summarize any information provided about participants' racial, ethnic, cultural, language, or religious backgrounds as described in the study. If the study provides direct quotes or data, be sure to include them with page numbers.   If no such information is reported, write "Not reported". | Required | One answer | Text |
| **48** | Education | | Report the participants’ education levels as described in the study. This might include the highest level of education completed, literacy levels, or other relevant details. If percentages or breakdowns are provided, be sure to include them.  If not reported, write "Not reported". | Required | One answer | Text |
| **49** | Socioeconomic Status | | Note any information about participants’ socioeconomic status. This may include income levels, wealth quintiles, poverty status, housing conditions, or types of assets owned. If the study explains how socioeconomic status was measured, be sure to describe that as well. You can often find this information in the participant characteristics section or in tables.   If not mentioned, write "Not reported". | Required | One answer | Text |
| **50** | Occupation | | Record participants’ main types of employment, work status, or any related information as reported in the study.   If such information is not provided, write "Not reported". | Required | One answer | Text |
| **51** | Place of Residents (rural, urbain; migrants, nomads; refugees, conflict affected populations) [2] | | Describe the specific place of residence or location of the participants. This refers to where the participants themselves are based, which may be more specific or different from the overall study setting. Use categories such as rural or urban, and include any relevant details about their population status. For example, whether they are refugees, part of conflict-affected populations, or nomadic groups.   If this information is not clearly stated, write "Not reported". | Required | One answer | Text |
| **52** | Health status | | Provide any information about participants’ health status. This might include general health conditions, presence of chronic illnesses, nutritional status, or any specific health concerns relevant to the study. You can usually find this in the participant characteristics section or baseline tables.   If no health information is reported, write "Not reported". | Required | One answer | Text |
| **53** | **Climate focus and outcomes** | Climate focus | | Indicate if the study focuses on climate adaptation, mitigation, or both, using terms from the authors when possible. Select from the dropdown list provided. | Required | One answer | Select from dropdown |
| **54** | Climate threat specified? | | Identify the climate threat/s as mentioned in the study. If multiple threats are discussed, include all. | Required | One answer | Text |
| **55** | Climate-related variables analyzed? | | Indicate whether the study includes an analysis of climate-related variables (e.g. temperature, rainfall variability, GHG emissions, etc). If the study includes such, specify which climate-related variables were examined.   Write "No" if not included. | Required | Multiple answers allowed | Text |
| **56** | Impact scale | | Specify the scale at which the climate intervention had an impact. Choose all relevant levels that apply to the study, one per cell. Use the dropdown list provided. The available choices are listed in the next cell or column.   Select "Unclear" if not mentioned or specified. | Required | Multiple answers allowed | Select from dropdown |
| **57** | Intervention | | **This field (row 57), down to value units (row 69), should only be filled if the study includes measures of mitigation potential. Otherwise, leave blank.**  Summarize or describe the climate-related intervention evaluated or described in the study | Optional | One answer | Text |
| **58** | Baseline/comparison | | Describe or identify the comparison group used in the study, such as baseline group, control group, or any other reference group. | Optional | Multiple answers allowed | Text |
| **59** | Impact timeframe of intervention | | Note the time period during which the intervention's climate impacts were measured. Include both the duration of the measurement period and any relevant timing details. Record each in separate cells. | Optional | Multiple answers allowed | Text |
| **60** | GHG indicator | | Select all greenhouse gas (GHG) indicators that were used in the study. Use the dropdown list provided. The available choices are listed in the next cell or column. | Optional | Multiple answers allowed | Select from dropdown |
| **61** | Emission reduction/sequestration Effect Estimate | | Enter the reported statistical measure for the intervention’s effect on emission reduction/sequestration.   Write "Not reported” if no such estimate is provided. | Optional | Multiple answers allowed | Text |
| **62** | Adjusted? | | Indicate whether the effect estimate was adjusted for confounding variables. Select "Yes" if clearly adjusted, "No" if not adjusted or not specified. | Optional | Multiple answers allowed | Select from dropdown |
| **63** | Emission reduction/sequestration value | | Record any reported quantified reduction/sequestration. Include the value as reported.   If not available, write "Not reported". | Optional | Multiple answers allowed | Numeric |
| **64** | Standard Error | | Enter the standard error, if provided. If not reported, leave blank. | Optional | Multiple answers allowed | Text |
| **65** | 95% Confidence Interval [Lower limit - Upper limit] | | Enter the reported lower and upper bounds of the confidence interval. If not reported, leave blank. | Optional | Multiple answers allowed | Text |
| **66** | P value | | Enter the p-value associated with the effect estimate. Write exact value, if available. If not reported, leave blank. | Optional | Multiple answers allowed | Text |
| **67** | Value units (eg tons of CO2e/year/ person) | | Specify the units used to report the emission value. Make sure to capture the exact units as described in the study. If no units are specified, leave blank. | Optional | Multiple answers allowed | Text |
| **68** | Results Description | | Capture the key findings for outcomes as reported in the study. You may copy directly relevant results from the paper, such as narrative interpretations of the results, trends, changes, or any significant findings. Include page numbers for reference. | Optional | Multiple answers allowed | Text |
| **69** | Notes | | In own words, for each indicator, briefly summarize the direction of effect and its significance based on the results. Alternatively, provide any additional information, clarifications, or context that may help interpret the climate outcome results later. | Optional | Multiple answers allowed | Text |
| **70** | **Nutrition Outcome/Comparison** | Outcome category | | **When extracting nutrition outcomes, please focus only on nutrition outcomes that are included in our predefined list of outcomes of interest. If the study reports multiple outcomes, only include those that match the outcomes we’re tracking for this review.**   Select the broad category of nutrition outcome reported in the study. Use the dropdown list provided. The available choices are listed in the next cell or column. | Required | Multiple answers allowed | Select from dropdown |
| **71** | Outcome indicator | | Select the specific nutrition indicator reported in the study. Use the dropdown list provided. The available options are shown in the next cell or column. If you selected a specific outcome category earlier like "Food Security (FS)", choose an indicator that matches this category. For example, indicators under food security should begin with "FS".  If you previously selected "No nutritional outcomes", leave blank. | Optional | Multiple answers allowed | Select from dropdown |
| **72** | If other, insert outcome indicator | | If the indicator is not included in the dropdown list, write out the full name of the outcome indicator exactly as it appears in the study. Otherwise write "NA". | Optional | Multiple answers allowed | Text |
| **73** | Unit of measurement | | Specify the unit of measurement used for the nutrition indicator, if applicable.   If not applicable, write "NA". | Required | Multiple answers allowed | Text |
| **74** | Comparison | | Describe how the nutrition outcomes were compared in the study. Specify whether comparisons were made with a control group, before and after the intervention within the same group, or between different population subgroups. Record each comparison group separately in the following cells.   If it’s a control group, you can label it as "Control households" and provide a short explanation of who they are and how they were selected. If the study did not include any comparison, write "No comparison.” | Required | One answer | Text |
| **75** | Notes | | State any other relevant information, clarifications, or context about how the nutrition outcomes were measured or interpreted. Leave blank if none. | Optional | Multiple answers allowed | Text |
| **76** | **Results: Continuous Outcome (e.g.: intake of specific foods, continuous scales (HFIAS, FCS, HDDS, HAZ)** | Intervention/Exposure | # of participants | **This section, from row 76 to 90, is specifically for extracting results related to continuous outcomes, based on the outcome indicator entered in row 70 and any other relevant outcome indicator in row 71. If the information is not reported, leave blank.**  Enter the number of participants in the intervention or exposure group for whom the outcome was measured. | Optional | Multiple answers allowed | Numeric |
| **77** | Mean | Enter the average value of the continuous outcome as reported in the study. | Optional | Multiple answers allowed | Numeric |
| **78** | Standard Deviation (SD) | Enter the standard deviation associated with the mean. | Optional | Multiple answers allowed | Numeric |
| **79** | Comparison/Control | # of participants | Enter the number of participants in the comparison or control group for whom the outcome was measured. | Optional | Multiple answers allowed | Numeric |
| **80** | Mean | Enter the average value of the continuous outcome as reported in the study. | Optional | Multiple answers allowed | Numeric |
| **81** | Standard Deviation (SD) | Enter the standard deviation associated with the mean. | Optional | Multiple answers allowed | Numeric |
| **82** | Reported Effect Estimate | Effect estimate | Record the type of effect measure reported in the study. This should reflect the specific statistical method the authors used to describe the relationship between the intervention and outcome. Common examples include Mean Difference, Odds Ratio, Risk Ratio, or Regression Coefficient. Specify the type as mentioned in the paper. | Optional | Multiple answers allowed | Text |
| **83** | Adjusted? | Indicate whether the effect estimate was adjusted for confounding variables (e.g. age, sex, ses, etc.). Select "Yes" if clearly adjusted, "No" if not adjusted or not specified. | Optional | Multiple answers allowed | Select from dropdown |
| **84** | Value | Enter the effect estimate value as reported in the study. | Optional | Multiple answers allowed | Numeric |
| **85** | Standard Error | Enter the standard error, if provided. If not reported, leave blank. | Optional | Multiple answers allowed | Numeric |
| **86** | 95% Confidence Interval [Lower limit - Upper limit] | Enter the reported lower and upper bounds of the confidence interval. If not reported, leave blank. | Optional | Multiple answers allowed | Text |
| **87** | P value | Enter the p-value associated with the effect estimate. Write exact value, if available. If not reported, leave blank. | Optional | Multiple answers allowed | Text |
| **88** | Results Description | | Capture the key findings for outcomes as reported in the study. You may copy directly relevant results from the paper, such as narrative interpretations of the results, trends, changes, or any significant findings. Include page numbers for reference. | Optional | Multiple answers allowed | Text |
| **89** | Were propensity score methods used? | | Indicate whether the study used propensity score methods, such as matching or weighting. These techniques are typically described in the methods or analysis sections. Select "Yes" if clearly reported, or "No" if not mentioned. | Optional | One answer | Select from dropdown |
| **90** | Notes | | In own words, for each indicator, briefly summarize the direction of effect and its significance based on the results. Alternatively, provide any additional information, clarifications, or context that may help interpret the continuous outcome results later. | Optional | Multiple answers allowed | Text |
| **91** | **Results: Dichotomous Outcome (e.g.: food insecurity, stunting)** | Intervention/  Exposure | # of People with event | **This section, from row 91 to 103, is specifically for extracting results related to dichotomous outcomes, based on the outcome indicator entered in row 68 and any other relevant outcome indicator in row 69. If the information is not reported, leave blank.**  Enter the number of participants in the intervention or exposure group who experienced the outcome. For example, if 10 out of 50 participants in the intervention group experienced food insecurity (outcome), enter 20 here. | Optional | Multiple answers allowed | Numeric |
| **92** | Total # of People or total follow-up time | Enter the total number of participants in the intervention or exposure group, or the total follow-up time if reported instead. In the example above, you would enter 50 here. | Optional | Multiple answers allowed | Numeric |
| **93** | Comparison/Control | # of People with event | Enter the number of participants in the comparison/control group who experienced the outcome. For example, if 20 out of 50 participants in the comparison/control group experienced food insecurity (outcome), enter 20 here. | Optional | Multiple answers allowed | Numeric |
| **94** | Total # of People or total follow-up time | Enter the total number of participants in the comparison/control group, or the total follow-up time if reported instead. In the example above, you would enter 50 here. | Optional | Multiple answers allowed | Numeric |
| **95** | Reported Effect Estimate | Effect estimate | Record the type of effect measure reported in the study. This should reflect the specific statistical method the authors used to describe the relationship between the intervention and outcome. Common examples include Mean Difference, Odds Ratio, Risk Ratio, or Regression Coefficient. Specify the type as mentioned in the paper. | Optional | Multiple answers allowed | Text |
| **96** | Adjusted? | Indicate whether the effect estimate was adjusted for confounding variables (e.g. age, sex, ses, etc.). Write "Yes" if clearly adjusted, "No" if not adjusted or not specified. | Optional | Multiple answers allowed | Select from dropdown |
| **97** | Value | Enter the effect estimate value as reported in the study. | Optional | Multiple answers allowed | Numeric |
| **98** | Standard Error | Enter the standard error, if provided. If not reported, leave blank. | Optional | Multiple answers allowed | Numeric |
| **99** | 95% Confidence Interval [Lower limit - Upper limit] | Enter the reported lower and upper bounds of the confidence interval. If not reported, leave blank. | Optional | Multiple answers allowed | Text |
| **100** | P value | Enter the p-value associated with the effect estimate. Write exact value, if available. If not reported, leave blank. | Optional | Multiple answers allowed | Text |
| **101** | Results Description | | Capture the key findings for outcomes as reported in the study. You may copy directly relevant results from the paper, such as narrative interpretations of the results, trends, changes, or any significant findings. Include page numbers for reference. | Optional | Multiple answers allowed | Text |
| **102** | Were propensity score methods used? | | Indicate whether the study used propensity score methods, such as matching or weighting. These techniques are typically described in the methods or analysis sections. Select "Yes" if clearly reported, or "No" if not mentioned. | Optional | One answer | Select from dropdown |
| **103** | Notes | | In own words, for each indicator, briefly summarize the direction of effect and its significance based on the results. Alternatively, provide any additional information, clarifications, or context that may help interpret the dichotomous outcome results later. | Optional | Multiple answers allowed | Text |
| **104** | **Results: Controlled Before- and-After study (CBA)** | Intervention/  Exposure | Post-intervention or change from baseline? | **This section, from rows 104 to 119, is specifically for extracting results from studies using the Controlled Before-and-After (CBA) design. If not, leave this section blank.**  Indicate whether the result reported for the intervention or exposure group is a post-intervention value or a change from baseline. Select "Post-intervention" if the result is the final outcome measured after the intervention. Select "Change from baseline" if the result represents the difference between the outcome after the intervention and the baseline measurement before the intervention. | Optional | Multiple answers allowed | Select from dropdown |
| **105** | Number of participants | Enter the number of participants in the intervention group at post-intervention measurement. | Optional | Multiple answers allowed | Numeric |
| **106** | Intervention result, post intervention | Enter the outcome value after the intervention or the reported change from baseline. Ensure that the format and units are consistent with how they are reported in the study. | Optional | Multiple answers allowed | Numeric |
| **107** | Standard Deviation (SD), post intervention | Enter the SD for the post-intervention result or for the change from baseline, depending on what is reported. If not reported, leave blank. | Optional | Multiple answers allowed | Numeric |
| **108** | Comparison/Control | Number of participants | Enter the number of participants in the comparison/control group at post-intervention measurement. | Optional | Multiple answers allowed | Numeric |
| **109** | Control result, post intervention | Enter the outcome value after the intervention or the reported change from baseline. Ensure that the format and units are consistent with how they are reported in the study. | Optional | Multiple answers allowed | Numeric |
| **110** | Standard Deviation (SD), post intervention | Enter the SD for the post-intervention result or for the change from baseline, depending on what is reported. If not reported, leave blank. | Optional | Multiple answers allowed | Numeric |
| **111** | Reported Effect Estimate | Effect estimate | Record the type of effect measure reported in the study. This should reflect the specific statistical method the authors used to describe the relationship between the intervention and outcome. Common examples include Mean Difference, Odds Ratio, Risk Ratio, or Regression Coefficient. Specify the type as mentioned in the paper. | Optional | Multiple answers allowed | Text |
| **112** | Adjusted? | Indicate whether the effect estimate was adjusted for confounding variables (e.g. age, sex, ses, etc.). Select "Yes" if clearly adjusted, "No" if not adjusted or not specified. | Optional | Multiple answers allowed | Select from dropdown |
| **113** | Value | Enter the effect estimate value as reported in the study. | Optional | Multiple answers allowed | Numeric |
| **114** | Standard Error | Enter the standard error, if provided. If not reported, leave blank. | Optional | Multiple answers allowed | Numeric |
| **115** | 95% Confidence Interval [Lower limit - Upper limit] | Enter the reported lower and upper bounds of the confidence interval. If not reported, leave blank. | Optional | Multiple answers allowed | Text |
| **116** | P value | Enter the p-value associated with the effect estimate. Write exact value, if available. If not reported, leave blank. | Optional | Multiple answers allowed | Text |
| **117** | Results Description | | Capture the key findings for outcomes as reported in the study. You may copy directly relevant results from the paper, such as narrative interpretations of the results, trends, changes, or any significant findings. Include page numbers for reference. | Optional | Multiple answers allowed | Text |
| **118** | Were propensity score methods used? | | Indicate whether the study used propensity score methods, such as matching or weighting. These techniques are typically described in the methods or analysis sections. Select "Yes" if clearly reported, or "No" if not mentioned. | Optional | One answer | Select from dropdown |
| **119** | Notes | | In own words, for each indicator, briefly summarize the direction of effect and its significance based on the results. Alternatively, provide any additional information, clarifications, or context that may help interpret the CBA results later. | Optional | Multiple answers allowed | Text |
| **120** | **Results: Interrupted Time Series study (ITS)** | Total number of participants | Total number of participants at baseline | **This section, form rows 120 to 134, is specifically for extracting results from Interrupted Time Series (ITS) studies. If not, leave blank.**  Report the total number of participants at baseline or pre-intervention for the specific outcome being measured. | Optional | Multiple answers allowed | Numeric |
| **121** | Number of missing participants | Note how many participants dropped out or were not observed over the time series. This may be reported per time point or as a total. If exact dropout numbers are not provided, you may estimate the number based on the difference between the pre- and post-intervention sample sizes.   If no information is available, leave blank. | Optional | Multiple answers allowed | Numeric |
| **122** | Pre-intervention | No. of time points measured | Enter how many time points were collected pre-intervention. | Optional | Multiple answers allowed | Numeric |
| **123** | Mean value | Enter the average outcome value observed at the pre-intervention time points, or at the last pre-intervention time point. | Optional | Multiple answers allowed | Numeric |
| **124** | Standard Deviation (SD) | Enter the SD associated with the pre-intervention mean. If not reported, leave blank. | Optional | Multiple answers allowed | Numeric |
| **125** | Post-intervention | No. of time points measured | Enter how many time points were collected post-intervention. | Optional | Multiple answers allowed | Numeric |
| **126** | Mean value | Enter the average outcome value observed at the post-intervention time points, or at the last post-intervention time point. | Optional | Multiple answers allowed | Numeric |
| **127** | Standard Deviation (SD) | Enter the SD associated with the pre-intervention mean. If not reported, leave blank. | Optional | Multiple answers allowed | Numeric |
| **128** | Reported Effect Estimate | Effect estimate | Specify the type of effect estimate reported for the interrupted time series analysis. This is often presented as regression coefficients, but may also include other measures such as Odds Ratio, Mean Differences, or etc. | Optional | Multiple answers allowed | Text |
| **129** | Adjusted? | Indicate whether the effect estimate was adjusted for confounding variables (e.g. age, sex, ses, etc.). Write "Yes" if clearly adjusted, "No" if not adjusted or not specified. | Optional | Multiple answers allowed | Select from dropdown |
| **130** | Value | Enter the effect estimate value as reported in the study. | Optional | Multiple answers allowed | Numeric |
| **131** | Standard Error | Enter the standard error, if provided. If not reported, leave blank. | Optional | Multiple answers allowed | Numeric |
| **132** | 95% Confidence Interval [Lower limit - Upper limit] | Enter the reported lower and upper bounds of the confidence interval. If not reported, leave blank. | Optional | Multiple answers allowed | Text |
| **133** | P value | Enter the p-value associated with the effect estimate. Write exact value, if available. If not reported, leave blank. | Optional | Multiple answers allowed | Text |
| **134** | Notes | | In own words, for each indicator, briefly summarize the direction of effect and its significance based on the results. Alternatively, provide any additional information, clarifications, or context that may help interpret the ITS results later. | Optional | Multiple answers allowed | Text |
| **135** | **Study Conclusions, Recommendations, and Limitations** | Brief description of the authors' overall conclusions based on research question and objectives. | | Summarize the key conclusions presented by the authors, relate them to the research questions and objectives. Preferably 2-3 sentences. You may also include a direct quote with a page number if it clearly captures the authors' main point. | Required | One answer | Text |
| **136** | Brief description of the key recommendations as stated by the author. | | Extract any recommendations made by the authors. Summarize them in 2-3 clear and concise points. You may also include a direct quote with a page number if it effectively captures the authors' main recommendation. | Required | One answer | Text |
| **137** | Brief description of the limitations of the study as stated by the authors. | | Identify any limitations explicitly mentioned by the authors. These might relate to the study’s scope, methodology, data, or any other aspects. Use the authors’ wording where possible, and include the page number. | Required | One answer | Text |
| **138** | Notes | | State any relevant information, clarifications, or context that hasn’t been captured above. This can also be used to clarify any ambiguous or unclear statements made by the authors. | Optional | One answer | Text |
| **139** | Acronyms | | Please list all acronyms used in the extracted information from the paper and spell out each one in full. You may also include local or context-specific terms, along with brief definitions or explanations. | Optional | Multiple answers allowed | Text |
| **140** | **Study Identification and Form Details** | Form finish time (HH:MM) | | Record the local time when you completed data extraction for this study using HH:MM. The cell is already formatted to accept time in the 24-hour format. | Required | One answer | Numeric |
| **141** | Time to complete | | This field automatically calculates the total time spent completing the form for this study, based on the formula in the cell. | Auto | One answer | Numeric |

# Supplementary Methods 7: Critical appraisal

## 7.1 Critical appraisal form and guide

We assessed the risk of bias of experimental and quasi-experimental studies using an adapted version of the Cochrane Risk of Bias Tool from Snilsveit et al. 2019.21Seven criteria questions were answered as ‘Yes,’ ‘No,’ or ‘Unclear’ Risk of Bias:

1. Mechanism of assignment: Was the allocation or identification mechanism able to control for selection bias?

2. Group equivalence: Was the method of analysis executed adequately to ensure comparability of groups throughout the study and prevent confounding?

3. Performance bias: Was the process of being observed free from motivation bias?

4. Spill‐overs, cross‐overs and contamination: was the study adequately protected against spill‐overs, cross‐overs and contamination?

5. Selective outcome reporting: Was the study free from selective outcome reporting?

6. Selective analysis reporting: Was the study free from selective analysis reporting?

7. Other risks of bias: Is the study free from other sources of bias?

The guide used for the critical assessment is included below:

| 1 | **Section/  Sub-section** | **Field** | **Instructions** | **Field Specifications** | | |
| --- | --- | --- | --- | --- | --- | --- |
| 2 | **Required /Optional** | **Response Limit** | **Response Format** |
| 3 | **Study Identification and Form Details** | Form start time (HH:MM) | Record the local time when you begin data extraction for this study using HH:MM. The cell is already formatted to accept time in the 24-hour format. | Required | One answer | Numeric |
| 4 | Study EPPI ID | Copy this and the next three cells from the 'Studies to review list' (EPPI ID to Study title). Verify the EPPI ID assigned to this study. This ID will have been provided to you during the allocation or assignment process . | Required | One answer | Numeric |
| 5 | First Author | Verify the last name (surname) of the first author listed in the study’s citation, usually found at the top of the first page or in the abstract. | Required | One answer | Text |
| 6 | Year | Verify the year the study was published. You can find the publication year in the citation or on the title page of the study. If the study is not cited, refer to the publication details, such as the journal’s website or publisher’s information. | Required | One answer | Numeric |
| 7 | Study title | Verify the full title of the study exactly as it appears in the publication. | Required | One answer | Text |
| 8 | Reviewer Initials | Enter the initials of your first and last names. Use only uppercase letters for your initials and maintain consistency in the format each time. | Required | One answer | Text |
| 9 | Date form completed | Enter the date you completed the data extraction form. Please use the format DD/MM/YYYY. | Required | One answer | Numeric |
| 10 | **Study Characteristics** | What type of study design is used? | 1 = Randomized controlled trial (RCT) (random assignment to households/individuals)  2 = Cluster‐RCT  3 = RDD (quasi-experiment with discontinuity assignment)  4 = CBA (comparison group with baseline and endline data collection)  5 = Panel data, but no baseline  6 = Comparison group with endline data only  7 = Natural experiment  8 = Other | Required | One answer | Select from dropdown |
| 11 | Which methods are used to control for selection bias and confounding? | 1 = PSM  2 = Covariate matching 3= DID  4= IV‐regression  5 = Heckman selection model  6 = Fixed effects regression  7 = Other regression  8 = Randomized study | Required | One answer | Select from dropdown |
| 12 | **Mechanism of assignment** | 1: Mechanism of assignment: was the allocation or identification mechanism able to control for selection bias? | **Definition** “In its Risk of Bias Tool, Cochrane defines selection bias as the result of “systematic differences between baseline characteristics of the groups that are compared.””22  **How to Tell if Bias is Addressed in the Study** Experimental: The authors used a randomization method that was truly random and based purely on chance (e.g. computer-generated allocation qualifies; allocation based on days of the week would not qualify).23,24 Baseline differences between intervention groups should not suggest a problem with randomization (e.g. excessive statistical differences between several groups, odd group sample sizes, imbalances in outcomes measured at baseline that are unlikely to be due to chance).24 Allocation sequence should be concealed from group assignors until participants are assigned interventions.23,24  Quasi-experimental: The study should include an independent, separate control group that did not receive the treatment or intervention.25 The authors can control for selection bias during treatment group allocation by matching on observed characteristics (for example geographic proximity, or treatment eligibility) to select a comparison group, minimizing baseline differences. This differs from propensity score matching, where the control and treatment groups are predefined, and matching is performed post-allocation to adjust for differences in covariates.  **How to Classify (Yes, No, Unclear)**  **Experimental:**  1. Is randomization method truly random?  2. Do baseline differences between groups suggest that randomization was successful?  **Select YES** if both 1 AND 2 are yes.  **Select NO** if 1 AND/OR 2 are no.  Otherwise, **select UNCLEAR**.  *Note: allocation sequence blinding is a strength but not necessary for a YES.  **Quasi-experimental:**  1. Is there an independent, separate control group that did not receive the treatment or intervention?  2. Were controls selected during allocation, matching for observed characteristics?  **Select YES** if both 1 AND 2 are yes.  **Select NO** if 1 AND/OR 2 are no.  Otherwise, **select UNCLEAR**. | Required | One answer | Select from dropdown: 1 = Yes 2 = No 8 = Unclear |
| 13 | Justification for coding decision | Include a brief summary of justification for rating, mentioning your response to all sub questions, cite relevant pages | Required | One answer | Text |
| 14 | **Group equivalence** | 2: Group equivalence: was the method of analysis executed adequately to ensure comparability of groups throughout the study and prevent confounding? | **Definition** “Confounding occurs when there are common causes of the choice of intervention and the outcome of interest. In the presence of confounding, the association between intervention and outcome differs from its causal effect.”   **How to Tell if Bias is Addressed in the Study** Experimental: The authors control for known confounders identified at baseline using statistical analysis (including them in regression).  Quasi-experimental: The authors compensate for non-random assignment using statistical methods, such as statistical matching, regression discontinuity, difference-in-differences, synthetic controls, fixed effects estimation, or inverse probability weighting.26 If regression is used, confounders identified at baseline should be included in the analysis. A sensitivity analysis to measure the effects of confounders on results would be a strength.26  **How to Classify (Yes, No, Unclear)**  **Experimental**  1. Are known confounders controlled for using statistical analysis?  **Quasi-experimental**  1. Are any of the following statistical methods used: statistical matching, regression discontinuity, difference-in-differences, synthetic controls, fixed effects estimation, or inverse probability weighting?  2. If regression is used, are confounders included in the regression?  **Select YES** if 1 AND 2 are yes (ignore 2 if no regression is used).  **Select NO** if 1 AND/OR 2 are no.  Otherwise, **select unclear**.  *Note: sensitivity analysis is a strength but not necessary for a YES. | Required | One answer | Select from dropdown: 1 = Yes 2 = No 8 = Unclear |
| 15 | Justification for coding decision | Include a brief summary of justification for rating, mentioning your response to all sub questions, cite relevant pages | Required | One answer | Text |
| 16 | **Spill-overs, cross-overs and contamination** | 3: Spill‐overs, cross‐overs and contamination: was the study adequately protected against spill‐ overs, cross‐overs and contamination? | **Definition** “A crossover occurs where a treatment unit moves from treatment to comparison group (crossover) and contamination occurs where a comparison unit moves to the treatment group. Spillover effects refer to indirect effects of intervention in control caused by interactions (dependence) between treatment and control groups.”   **How to Tell if Bias is Addressed in the Study** Authors can help protect against spillover effects using cluster-level analysis. The study participants or clusters should be subject to a reasonable geographic or social separation that would limit control groups exposure to the treatment.27 Authors can help protect against crossovers and contamination by blinding participants and intervention providers. Authors can further protect against crossovers and contaminations by doing an intention-to-treat (ITT) analysis. Instrumental variable estimation can also be used to isolate the causal effect of the treatment on only those that complied with assignment.27  **How to Classify (Yes, No, Unclear)**  1. Is cluster-level analysis used, or is there evidence that clusters or participants are geographically or socially separated to prevent spillover?  2. Is there any mention of participant or provider blinding to prevent crossovers or contamination?  3. Is intention-to-treat (ITT) analysis used, or is instrumental variable (IV) estimation used to account for noncompliance?  **Select YES** if 1 is a yes AND at least 2 OR 3.  **Select NO** if none OR only one of the above is addressed.  Otherwise, **select UNCLEAR**. | Required | One answer | Select from dropdown: 1 = Yes 2 = No 8 = Unclear |
| 17 | Justification for coding decision | Include a brief summary of justification for rating, mentioning your response to all sub questions, cite relevant pages | Required | One answer | Text |
| 18 | **Selective outcome reporting** | 4: Outcome reporting: was the study free from selective outcome reporting? | **How to Tell if Bias is Addressed in the Study** All outcomes that are pre-specified in the protocol should be reported in the results section. This should include reporting non-significant as well as significant results. Pre-specified analysis plans should precede the release of unblinded outcome data.24  If the pre-specified protocol does not describe the outcomes of interest in sufficient detail, check for other ways selective outcome reporting could arise26:  - if authors only report outcomes measured using one type of instrument when others were also used; - reporting outcomes arising from only the most favorable subscale of an instrument; - reporting only certain time points that the outcomes were measured at.  **How to Classify (Yes, No, Unclear)**  1. Are all pre-specified outcomes in the methods section reported in the results section, including non-significant and significant results?  2. Are all outcomes reported across different measurement instruments, instrument subscales, and time points used or assessed?  **Select YES** is both 1 AND 2 are yes.  **Select NO** if 1 AND/OR 2 are no.  Otherwise **select unclear**.  Note: Pre-specifying analysis plans before outcome data is unblinded, is a strength but not necessary for a YES. | Required | One answer | Select from dropdown: 1 = Yes 2 = No 8 = Unclear |
| 19 | Justification for coding decision | Include a brief summary of justification for rating, mentioning your response to all sub questions, cite relevant pages | Optional | One answer | Text |
| 20 | **Selective analysis reporting** | 5: Analysis reporting: was the study free from selective analysis reporting? | **How to Tell if Bias is Addressed in the Study** All analyses that are pre-specified in the protocol should be reported in the results section. This should include reporting non-significant as well as significant results.  If the pre-specified protocol does not describe the analysis plan in sufficient detail, check for other ways selective analysis reporting could arise. For example, if authors only report the most desirable results in the following scenarios26:  - Analyzing both change from baseline and post-treatment scores adjusted for baseline; - Analyzing results with and without transformation; - Analyzing results with and without controlling for confounders, or with a subset of confounders; - Using multiple analysis methods to account for missing data; - Changing continuous data to categorical data with different cutoffs; - Creating composite outcomes (combining outcomes into a single outcome category) and only reporting the significant result.  **How to Classify (Yes, No, Unclear)**  1. Are all pre-specified analyses in the methods section reported in the results section, including non-significant and significant results?  2. Do authors provide results for all analysis methods used (e.g., no evidence of selective reporting based on transformations, choice of confounders, analysis methods for missing data, outcome construction, or any other examples where multiple analysis methods were used)?  **Select YES** if both 1 AND 2 are yes.  **Select NO** if 1 AND/OR 2 are no.  Otherwise **select UNCLEAR**. | Optional | One answer | Select from dropdown: 1 = Yes 2 = No 8 = Unclear |
| 21 | Justification for coding decision | Include a brief summary of justification for rating, mentioning your response to all sub questions, cite relevant pages | Required | One answer | Text |
| 22 | **Performance bias** | 6: Performance bias: was the process of being observed free from motivation bias? | **Definition** “The Cochrane Risk of Bias Tool defines performance bias as the result of “systematic differences between groups in the care that is provided, or in exposure to factors other than the interventions of interest.””22  “Motivational biases, sometimes referred to as ‘self-serving’ biases, result from being invested in a specific outcome (e.g. a particular treatment being successful) ...”28  **How to Tell if Bias is Addressed in the Study** Participants should not be aware of their group assignment to prevent behavioral changes or outcome reporting influenced by their knowledge of treatment status. Similarly, those delivering the intervention should be blinded to the assignment to ensure consistent delivery of care or treatment across groups. If follow-up care was provided, blinding care providers is essential to prevent differential treatment.24  If there were non-protocol interventions (interventions that participants receive during follow-up which are not part of the study but may influence outcomes), it could bias results, particularly if the non-protocol interventions are unbalanced between intervention groups.29 To identify non-protocol interventions, look to see if participants received any additional treatment, support, or care that deviates from the study intervention described in the methods. Pay close attention to unequal care across groups. Non-protocol interventions may also be identified through the expert knowledge of the review team, reviews of the literature, and discussions with health professionals. 29  **How to Classify (Yes, No, Unclear)**  1. Were participants blinded to group assignment?  2. If applicable, were those delivering the intervention blinded to group assignment?  3. If care was provided during follow-up, were care providers blinded to group assignment?  4. Does the study appear to be free of non-protocol interventions, and if non-protocol interventions are identified, are they balanced between groups?  **Select YES** if 1,2,3, AND 4 are yes, if applicable.  **Select NO** if any of the above are no.  Otherwise, **select UNCLEAR**. | Optional | One answer | Select from dropdown: 1 = Yes 2 = No 8 = Unclear |
| 23 | Justification for coding decision | Include a brief summary of justification for rating, mentioning your response to all sub questions, cite relevant pages | Required | One answer | Text |
| 24 | **Other risks of bias** | 7: Other risks of bias: Is the study free from other sources of bias? | **Other sources of bias may include:** Unmeasured confounding if confounding variables are not measured or not included in the analysis. Residual confounding can also occur if a confounding domain is not measured, if it is measured with error, or if the relationship between the confounding domain and the outcome or exposure is modelled with error.30   Lead time bias can occur when the timing of measurement creates the illusion of improved outcomes. For example, if prevalent users of an intervention (existing users) are included, but not incident users (new users), outcome results that occurred early on may be excluded from the study.30  Attrition bias may arise due to differences in drop-out rates between groups. Studies should compare the characteristics of dropouts vs. completers and should use statistical methods to address for bias.28  Bias in measurement of the outcome can occur if measurers are aware of intervention status, different methods of measurement are used across intervention statuses, or there is differential measurement error across intervention statuses.30  Recall bias can be an issue in studies using self-reported outcomes such as interviews and questionnaires, where participants may misremember events and outcome indicators.31  **How to Classify (Yes, No, Unclear)**  1. Are any of the risks of bias listed in the column to the left, or any other risks of bias, likely present in the study and not adequately controlled for? | Required | One answer | Select from dropdown: 1 = Yes 2 = No 8 = Unclear |
| 25 | Justification for coding decision | Include a brief summary of justification for rating, mentioning your response to all sub questions, cite relevant pages | Required | One answer | Text |
| 26 | Type of comparison group | 1 = No intervention (business as usual)  2 = Other intervention  3 = Placebo control  4 = Pipeline (wait-list) control | Required | One answer | Select from dropdown |
| 27 | Describe any nonenvironmental comparison group intervention received which treatment group does not? | Describe any nonenvironmental comparison group intervention received which treatment group does not? | Required | One answer | Text |
| 28 | Blinding of participants? | 1 = Yes 2 = No 9 = N/A | Required | One answer | Select from dropdown |
| 29 | Blinding of outcome assessors? | 1 = Yes 2 = No 9 = N/A | Required | One answer | Select from dropdown |
| 30 | Blinding of data analysts | 1 = Yes 2 = No 9 = N/A | Required | Multiple answers allowed | Select from dropdown |
| 31 | Describe method(s) used to blind | Describe method of placebo control or other methods used to blind | Required | One answer | Text |
| 32 | **Study Identification and Form Details** | Form finish time (HH:MM) | Record the local time when you completed data extraction for this study using HH:MM. The cell is already formatted to accept time in the 24-hour format. | Required | One answer | Numeric |
| 33 | Time to complete | This field automatically calculates the total time spent completing the form for this study, based on the formula in the cell. | Auto | One answer | Numeric |

## 7.2 Critical appraisal scoring approach

Based on the answers to the risk of bias assessments, we produced an overall rating for each study as low, medium, high, or critical risk of bias. We used the following decision rules to come to this decision, adapted from Snilsveit et al. 2019: “As selection bias is the most serious methodological issue affecting impact studies (…), we give a greater weight to methodological weaknesses is this area, as well as group equivalence and spillovers.

- If all questions are answered “yes”, studies are assigned a low risk of bias rating.
- If studies score “yes” for selection, group equivalence and spillovers, but “no” or “unclear” for other domains studies are assigned a medium risk of bias rating. If they score “yes” for two out of three of the categories selection, group equivalence and spillovers, and unclear for another, we assign a medium risk of bias rating.
- If studies score “no” for any one of the following: selection, group equivalence or spillovers they are assigned a high‐risk of bias rating. For studies unclear on two or more of the three key categories (selection, group equivalence or spillovers) but that attempted matching/matching w. regression, we give a high‐risk of bias rating.
- If studies score “no” for more than one of the selection, group equivalence or spillover questions the study is assigned a critical risk of bias rating.
- Otherwise, we take an unclear rating as “no”.”21

# References for Supplementary Methods

1. Tricco, C.A. *et al.* PRISMA Extension for Scoping Reviews (PRISMA-ScR): Checklist and Explanation. *Ann. Intern. Med.* https://doi.org/10.7326/M18-0850 (2018) doi:10.7326/M18-0850.

2. Sparling, T. M. *et al.* Systematic evidence and gap map of research linking food security and nutrition to mental health. *Nat Commun* 13, 4608 (2022).

3. Ruel, M. T., Alderman, H., & Maternal and Child Nutrition Study Group. Nutrition-sensitive interventions and programmes: how can they help to accelerate progress in improving maternal and child nutrition? *Lancet Lond. Engl.* 382, 536–551 (2013).

4. Keats, E. C. *et al.* Effective interventions to address maternal and child malnutrition: an update of the evidence. *Lancet Child Adolesc. Health* 5, 367–384 (2021).

5. FAO. *Climate Action and Nutrition - Pathways to Impact*. http://dx.doi.org/10.4060/cc8415en (2023) doi:10.4060/cc8415en.

6. Fanzo, J. *et al.* The Food Systems Dashboard is a new tool to inform better food policy. *Nat Food* 1, 243–246 (2020).

7. Murphy, K. *et al.* *Evidence Review for Food Security, Nutrition, and Climate-Resilience Interventions*. https://innovationcommission.uchicago.edu/wp-content/uploads/2024/09/Final-Report.pdf (2024).

8. Moore, N. *et al.* Protocol: The effects of food systems interventions on food security and nutrition outcomes in low- and middle- income countries: an evidence gap map. (2020).

9. International Initiative for Impact Evaluation (3ie) and University of East Anglia (UEA) *et al.* *The Evidence on Food Systems and Nutrition: Insights from a Living Evidence and Gap Map*. https://3ieimpact.org/evidence-hub/publications/evidence-gap-maps/evidence-food-systems-and-nutrition-insights-living (2024) doi:10.23846/EGM035.

10. International Initiative for Impact Evaluation. Taxonomy explorer. *3IE* https://developmentevidence.3ieimpact.org/taxonomy-search.

11. Murphy, K. *et al.* Evidence Review for Food Security, Nutrition, and Climate-Resilience Interventions. (2025).

12. Little, D. C. & Edwards, P. *Integrated Livestock-Fish Farming Systems*. (FOOD AND AGRICULTURE ORGANIZATION OF THE UNITED NATIONS, Rome, 2003).

13. Project Drawdown. Table of Solutions. https://drawdown.org/solutions/table-of-solutions.

14. Food and Agriculture Organization of the United Nations. Agroforestry. *Agroforestry* http://www.fao.org/agroforestry/en.

15. Bezner Kerr, R. *et al.* Can agroecology improve food security and nutrition? A review. *Glob. Food Secur.* 29, 100540 (2021).

16. Wezel, A. *et al.* Agroecological principles and elements and their implications for transitioning to sustainable food systems. A review. *Agron. Sustain. Dev.* 40, 40 (2020).

17. Gunapala, R. *et al.* Urban agriculture: A strategic pathway to building resilience and ensuring sustainable food security in cities. *Farming Syst.* 3, 100150 (2025).

18. Veršinskas, T. *et al.* *Land Consolidation*. (FAO ;, 2021).

19. Aslam, M. & Fazal, S. Exploring the impact of land fragmentation on the performance of agriculture: a systematic review. *Discov. Agric.* 3, 1–19 (2025).

20. Willett, W. *et al.* Food in the Anthropocene: the EAT–Lancet Commission on healthy diets from sustainable food systems. *The Lancet* 393, 447–492 (2019).

21. Snilsveit, B. *et al.* Incentives for climate mitigation in the land use sector-the effects of payment for environmental services on environmental and socioeconomic outcomes in low- and middle-income countries: A mixed-methods systematic review. *Campbell Syst Rev* 15, e1045 (2019).

22. Mansournia, M. A., Higgins, J. P. T., Sterne, J. A. C. & Hernán, M. A. Biases in randomized trials: a conversation between trialists and epidemiologists. *Epidemiol. Camb. Mass* 28, 54 (2017).

23. Barker, T. H. *et al.* The revised JBI critical appraisal tool for the assessment of risk of bias for randomized controlled trials. *JBI Evid Synth* 21, 494–506 (2023).

24. Sterne, J. A. C. *et al.* RoB 2: a revised tool for assessing risk of bias in randomised trials. *BMJ* 366, l4898 (2019).

25. Barker, T. H. *et al.* The revised JBI critical appraisal tool for the assessment of risk of bias for quasi-experimental studies. *JBI Evid Synth* 22, 378–388 (2024).

26. Sterne, J. & Higgins, J. ROBINS-I V2 tool. https://www.riskofbias.info/welcome/robins-i-v2 (2024).

27. Waddington, H. *et al.* Quasi-experimental study designs series-paper 6: risk of bias assessment. *J Clin Epidemiol* 89, 43–52 (2017).

28. Miller, R. B. & Hollist, C. S. Attrition Bias. https://digitalcommons.unl.edu/famconfacpub/45 (2007).

29. Higgins, J. P. T., Savović, J., Page, M. J., Elbers, R. G. & Sterne, J. A. C. Chapter 8: Assessing risk of bias in a randomized trial [last updated October 2019]. in *Cochrane Handbook for Systematic Reviews of Interventions version 6.5* (ed. Higgins JPT, T. J., Chandler J, Cumpston M, Li T, Page MJ, Welch VA) (Cochrane, 2024).

30. Sterne JAC, H. M., McAleenan A, Reeves BC, Higgins JPT. Chapter 25: Assessing risk of bias in a non-randomized study [last updated October 2019]. in *Cochrane Handbook for Systematic Reviews of Interventions version 6.5* (ed. Higgins JPT, T. J., Chandler J, Cumpston M, Li T, Page MJ, Welch VA) (Cochrane, 2024).

31. NCI Dictionary of Cancer Terms. Recall bias. https://www.cancer.gov/publications/dictionaries/cancer-terms/def/recall-bias (2011).
